# Supplementary material for: Analysis of FOXP3+ Regulatory T Cells That Display Apparent Viral Antigen Specificity during Chronic Hepatitis C Virus Infection
Source: PubMed Central journal article supplement (PMC2791198; doi:10.1371/journal.ppat.1000707), 2009-12-24
Supplement: ppat.1000707.s001.pdf [file ppat.1000707.s001.pdf]

## Table S1

**Table S1-A (P5 vs.P6 and P5 vs. P7)**

Filtered for differential P value (Diff Pval) <0.05 and fold change >1.5 (Log<sub>2</sub>FC > 0.585 or <-0.585). The data space is empty if the criteria is not met.

All genes shown here have a detection P value <0.001 for at least P5

| TargetID   | SYMBOL   | P5 AVG_Signal | P6 AVG_Signal | P7 AVG_Signal | P5/P6 Log <sub>2</sub> FC | Diff Pval | P5/P7 Log <sub>2</sub> FC | Diff Pval |
|------------|----------|---------------|---------------|---------------|---------------------------|-----------|---------------------------|-----------|
| ILMN_7395  | ABCB1    | 26.987        | 226.998       | 523.773       | -3.072                    | 2.2E-34   | -4.279                    | 2.6E-34   |
| ILMN_21502 | ACVR1    | 1010.122      | 611.237       | 412.035       |                           |           | 1.294                     | 5.7E-05   |
| ILMN_8067  | ADA      | 620.405       | 707.342       | 1108.356      |                           |           | -0.837                    | 1.2E-02   |
| ILMN_30039 | ADAM23   | 105.412       | 194.346       | 146.961       | -0.883                    | 4.6E-03   |                           |           |
| ILMN_14814 | ADAM28   | 23.215        | 71.479        | 18.265        | -1.622                    | 1.5E-02   |                           |           |
| ILMN_16701 | ADAMTS4  | 61.293        | 5.831         | 6.483         | 3.394                     | 7.7E-09   | 3.241                     | 7.5E-09   |
| ILMN_19769 | ADCY9    | 42.680        | 78.093        | 112.554       |                           |           | -1.399                    | 1.4E-02   |
| ILMN_2022  | ADRB2    | 89.250        | 304.156       | 609.906       | -1.769                    | 9.6E-03   | -2.773                    | 3.2E-04   |
| ILMN_25998 | AFF3     | 67.119        | 127.172       | 26.986        | -0.922                    | 2.0E-02   |                           |           |
| ILMN_24336 | ALS2CR2  | 885.369       | 480.350       | 444.384       | 0.882                     | 2.6E-03   | 0.994                     | 1.0E-03   |
| ILMN_23219 | ALS2CR4  | 166.744       | 78.770        | 101.675       | 1.082                     | 2.5E-04   |                           |           |
| ILMN_23873 | ANGPTL6  | 36.612        | 75.110        | 39.225        | -1.037                    | 3.7E-02   |                           |           |
| ILMN_2714  | ANK3     | 90.867        | 441.031       | 435.994       | -2.279                    | 2.4E-20   | -2.262                    | 9.2E-05   |
| ILMN_28640 | ANKS1B   | 60.952        | 14.877        | 13.087        |                           |           | 2.220                     | 4.6E-02   |
| ILMN_22521 | ANTXR2   | 882.080       | 646.424       | 408.099       |                           |           | 1.112                     | 8.4E-03   |
| ILMN_14184 | ANXA1    | 1397.191      | 3900.022      | 3152.149      | -1.481                    | 2.0E-06   | -1.174                    | 5.7E-03   |
| ILMN_2504  | AOAH     | 45.084        | 89.490        | 306.167       |                           |           | -2.764                    | 8.3E-12   |
| ILMN_568   | AP3M2    | 1054.110      | 725.307       | 589.984       |                           |           | 0.837                     | 2.5E-02   |
| ILMN_4001  | APBA2    | 52.631        | 58.122        | 196.803       |                           |           | -1.903                    | 1.9E-04   |
| ILMN_18531 | APOBEC3F | 107.878       | 254.607       | 116.814       | -1.239                    | 5.8E-05   |                           |           |
| ILMN_23870 | APS      | 18.061        | 58.976        | 26.834        | -1.707                    | 1.0E-04   |                           |           |
| ILMN_23772 | ARHGAP24 | 32.515        | 115.706       | 19.310        | -1.831                    | 2.5E-03   |                           |           |
| ILMN_17477 | ARID5B   | 2315.718      | 1787.858      | 1423.483      |                           |           | 0.702                     | 3.1E-02   |
| ILMN_15416 | ARL4C    | 611.610       | 292.789       | 289.171       | 1.063                     | 2.4E-02   | 1.081                     | 1.9E-02   |
| ILMN_24845 | ATF7IP2  | 223.760       | 327.888       | 462.830       |                           |           | -1.049                    | 1.5E-03   |
| ILMN_10855 | ATP1B1   | 320.125       | 149.218       | 107.504       | 1.101                     | 3.3E-02   | 1.574                     | 1.8E-03   |
| ILMN_4348  | AUTS2    | 77.138        | 488.209       | 450.798       | -2.662                    | 5.4E-12   | -2.547                    | 6.0E-10   |
| ILMN_6524  | AXUD1    | 2084.573      | 1172.676      | 879.474       | 0.830                     | 1.7E-03   | 1.245                     | 9.7E-07   |
| ILMN_16050 | BAIAP2L1 | 31.435        | 8.945         | 1.372         |                           |           | 4.518                     | 4.4E-02   |

|            |           |          |          |          |        |         |        |         |
|------------|-----------|----------|----------|----------|--------|---------|--------|---------|
| ILMN_25922 | BANK1     | 231.650  | 1617.786 | 212.382  | -2.804 | 2.5E-10 |        |         |
| ILMN_3307  | BATF      | 1160.755 | 652.561  | 567.300  | 0.831  | 2.0E-03 | 1.033  | 1.3E-04 |
| ILMN_17359 | BCL11A    | 72.844   | 293.373  | 77.555   | -2.010 | 1.9E-06 |        |         |
| ILMN_25971 | BCL11A    | 19.782   | 106.622  | 19.612   | -2.430 | 8.3E-11 |        |         |
| ILMN_3868  | BCL2      | 2399.929 | 983.714  | 504.923  | 1.287  | 5.7E-08 | 2.249  | 1.6E-16 |
| ILMN_12148 | BCL2L1    | 656.518  | 275.446  | 350.680  | 1.253  | 7.7E-05 | 0.905  | 9.4E-03 |
| ILMN_540   | BCL6      | 736.738  | 1018.739 | 1280.835 |        |         | -0.798 | 4.5E-02 |
| ILMN_26827 | BCNP1     | 20.653   | 118.590  | 23.547   | -2.522 | 2.9E-07 |        |         |
| ILMN_23075 | BFSP2     | 43.592   | 11.260   | 4.754    | 1.953  | 1.1E-02 | 3.197  | 7.8E-05 |
| ILMN_23414 | BLK       | 120.499  | 684.435  | 142.636  | -2.506 | 2.2E-34 |        |         |
| ILMN_10290 | BLNK      | 84.320   | 405.177  | 67.087   | -2.265 | 3.3E-03 |        |         |
| ILMN_19896 | BLR1      | 386.195  | 1109.996 | 424.734  | -1.523 | 1.7E-08 |        |         |
| ILMN_27589 | BLR1      | 24.084   | 83.698   | 20.095   | -1.797 | 1.6E-03 |        |         |
| ILMN_16249 | BMF       | 78.692   | 161.601  | 63.255   | -1.038 | 4.3E-02 |        |         |
| ILMN_7936  | BRDG1     | 84.632   | 356.289  | 109.799  | -2.074 | 1.6E-04 |        |         |
| ILMN_27215 | BTG3      | 754.334  | 539.980  | 451.688  |        |         | 0.740  | 2.2E-02 |
| ILMN_28021 | BTK       | 432.607  | 1218.227 | 454.247  | -1.494 | 1.6E-02 |        |         |
| ILMN_5713  | BTLA      | 132.660  | 278.435  | 195.950  | -1.070 | 5.4E-05 |        |         |
| ILMN_12188 | BYSL      | 337.232  | 143.940  | 156.925  | 1.228  | 2.9E-03 | 1.104  | 1.3E-02 |
| ILMN_17888 | C10orf38  | 189.336  | 241.424  | 349.256  |        |         | -0.883 | 1.1E-02 |
| ILMN_9655  | C11orf17  | 865.864  | 577.592  | 501.625  |        |         | 0.788  | 6.6E-03 |
| ILMN_19053 | C13orf18  | 111.484  | 440.985  | 69.378   | -1.984 | 2.7E-04 |        |         |
| ILMN_21076 | C14orf139 | 500.571  | 321.709  | 285.172  |        |         | 0.812  | 8.7E-03 |
| ILMN_25974 | C16orf30  | 554.999  | 839.867  | 1103.876 |        |         | -0.992 | 7.6E-03 |
| ILMN_981   | C18orf25  | 1904.438 | 1271.382 | 1133.263 |        |         | 0.749  | 1.4E-02 |
| ILMN_14223 | C1GALT1C1 | 921.022  | 628.150  | 515.012  |        |         | 0.839  | 4.2E-03 |
| ILMN_25687 | C1orf142  | 449.546  | 271.429  | 301.524  | 0.728  | 1.6E-02 |        |         |
| ILMN_18969 | C1orf26   | 318.606  | 176.780  | 166.012  | 0.850  | 4.7E-02 | 0.940  | 2.8E-02 |
| ILMN_7678  | C1orf59   | 835.054  | 1039.112 | 1409.976 |        |         | -0.756 | 3.4E-02 |
| ILMN_2205  | C20orf3   | 675.016  | 721.862  | 1134.832 |        |         | -0.749 | 3.9E-02 |
| ILMN_16665 | C20orf35  | 1934.274 | 1361.986 | 1074.225 |        |         | 0.848  | 2.9E-03 |
| ILMN_7928  | C20orf55  | 1507.233 | 861.961  | 846.011  | 0.806  | 2.4E-03 | 0.833  | 4.0E-03 |
| ILMN_9603  | C3orf18   | 282.539  | 139.366  | 144.891  | 1.020  | 4.9E-04 | 0.963  | 6.8E-03 |
| ILMN_28059 | C3orf54   | 101.032  | 294.075  | 88.584   | -1.541 | 4.0E-09 |        |         |
| ILMN_14619 | C3orf59   | 382.505  | 146.219  | 78.568   | 1.387  | 1.7E-02 | 2.283  | 1.4E-04 |
| ILMN_1756  | C6orf190  | 71.491   | 285.579  | 351.560  | -1.998 | 6.4E-10 | -2.298 | 2.1E-10 |

|             |         |          |          |          |        |         |        |         |
|-------------|---------|----------|----------|----------|--------|---------|--------|---------|
| ILMN_13979  | C8orf70 | 268.950  | 157.567  | 60.200   |        |         | 2.160  | 8.8E-03 |
| ILMN_20760  | C9orf28 | 109.389  | 144.935  | 310.407  |        |         | -1.505 | 5.0E-06 |
| ILMN_21803  | C9orf45 | 159.616  | 342.099  | 255.117  | -1.100 | 3.1E-02 |        |         |
| ILMN_11032  | C9orf88 | 1198.180 | 850.808  | 540.058  |        |         | 1.150  | 3.3E-04 |
| ILMN_14654  | CASK    | 328.038  | 211.932  | 197.588  |        |         | 0.731  | 4.0E-02 |
| ILMN_4819   | CCL4L1  | 119.073  | 214.640  | 1169.111 |        |         | -3.295 | 7.3E-03 |
| ILMN_22732  | CCL5    | 115.780  | 639.401  | 3487.436 | -2.465 | 1.7E-06 | -4.913 | 3.9E-09 |
| ILMN_1503   | CCND2   | 3221.285 | 1899.822 | 2167.338 | 0.762  | 7.2E-03 |        |         |
| ILMN_21335  | CCR7    | 3351.368 | 4220.431 | 6375.991 |        |         | -0.928 | 6.6E-03 |
| ILMN_2004   | CD19    | 389.462  | 2025.985 | 404.720  | -2.379 | 1.4E-08 |        |         |
| ILMN_11761  | CD22    | 16.443   | 160.891  | 37.130   | -3.291 | 4.7E-05 |        |         |
| ILMN_20704  | CD300A  | 211.507  | 500.373  | 723.394  |        |         | -1.774 | 2.4E-04 |
| ILMN_2685   | CD40LG  | 148.371  | 308.007  | 291.398  | -1.054 | 2.1E-03 | -0.974 | 7.9E-03 |
| ILMN_18297  | CD55    | 1898.946 | 1370.573 | 1189.430 |        |         | 0.675  | 4.8E-02 |
| ILMN_20590  | CD72    | 161.493  | 656.378  | 241.558  | -2.023 | 5.2E-03 |        |         |
| ILMN_137396 | CD79A   | 472.711  | 2551.681 | 585.818  | -2.432 | 1.7E-23 |        |         |
| ILMN_138839 | CD79B   | 604.941  | 1728.919 | 471.350  | -1.515 | 1.2E-05 |        |         |
| ILMN_139125 | CD79B   | 646.847  | 2149.299 | 460.463  | -1.732 | 1.1E-11 |        |         |
| ILMN_2358   | CD8A    | 141.182  | 359.702  | 2515.448 |        |         | -4.155 | 3.1E-06 |
| ILMN_137981 | CD8B1   | 24.935   | 59.207   | 430.105  |        |         | -4.108 | 9.9E-03 |
| ILMN_2809   | CD96    | 1444.144 | 2038.883 | 2521.285 |        |         | -0.804 | 4.1E-02 |
| ILMN_21651  | CEACAM1 | 400.972  | 57.111   | 28.525   | 2.812  | 6.9E-04 | 3.813  | 1.6E-04 |
| ILMN_20142  | CEACAM1 | 1736.097 | 361.545  | 168.155  | 2.264  | 3.6E-05 | 3.368  | 2.7E-07 |
| ILMN_7509   | CENPE   | 41.957   | 9.674    | 31.476   | 2.117  | 4.7E-02 |        |         |
| ILMN_29669  | CHD7    | 42.585   | 97.725   | 75.004   | -1.198 | 4.4E-04 |        |         |
| ILMN_16218  | CHN2    | 12.134   | 28.467   | 53.191   |        |         | -2.132 | 3.9E-04 |
| ILMN_8537   | CHST10  | 17.281   | 35.120   | 50.155   |        |         | -1.537 | 2.8E-02 |
| ILMN_10462  | CISH    | 2648.860 | 399.216  | 246.998  | 2.730  | 3.1E-15 | 3.423  | 3.0E-18 |
| ILMN_15271  | CITED4  | 617.651  | 193.782  | 214.334  | 1.672  | 2.8E-04 | 1.527  | 7.0E-04 |
| ILMN_10458  | CLCF1   | 102.386  | 179.652  | 151.787  | -0.811 | 1.9E-02 |        |         |
| ILMN_13868  | CMAH    | 575.955  | 247.312  | 235.633  | 1.220  | 1.0E-02 | 1.289  | 5.9E-03 |
| ILMN_2147   | CMKOR1  | 257.637  | 136.867  | 119.983  | 0.913  | 1.5E-03 | 1.103  | 3.0E-04 |
| ILMN_789    | CMTM6   | 2415.089 | 1684.534 | 1258.523 |        |         | 0.940  | 4.9E-04 |
| ILMN_22539  | CNFN    | 14.616   | 63.488   | 28.886   | -2.119 | 3.9E-02 |        |         |
| ILMN_12678  | COBLL1  | 116.450  | 684.136  | 87.069   | -2.555 | 2.5E-06 |        |         |
| ILMN_7401   | COCH    | 31.539   | 182.060  | 19.780   | -2.529 | 3.8E-04 |        |         |

|             |         |          |          |          |        |         |        |         |
|-------------|---------|----------|----------|----------|--------|---------|--------|---------|
| ILMN_26478  | CORO1B  | 1902.500 | 895.478  | 682.291  | 1.087  | 1.8E-05 | 1.479  | 3.2E-09 |
| ILMN_26147  | CPNE5   | 19.767   | 128.656  | 20.980   | -2.702 | 4.2E-07 |        |         |
| ILMN_22421  | CR2     | 12.912   | 104.563  | 40.605   | -3.018 | 2.7E-06 |        |         |
| ILMN_17274  | CSNK1G2 | 418.041  | 512.891  | 707.272  |        |         | -0.759 | 3.9E-02 |
| ILMN_24458  | CST7    | 423.099  | 352.305  | 1996.513 |        |         | -2.238 | 1.3E-03 |
| ILMN_138103 | CTLA4   | 4317.317 | 1244.044 | 938.850  | 1.795  | 5.0E-03 | 2.201  | 1.3E-03 |
| ILMN_9279   | CTNNAL1 | 96.365   | 52.661   | 49.233   |        |         | 0.969  | 2.3E-02 |
| ILMN_4961   | CTSW    | 289.235  | 229.020  | 1019.696 |        |         | -1.818 | 4.3E-03 |
| ILMN_10449  | CXXC5   | 389.546  | 1058.862 | 514.579  | -1.443 | 6.5E-04 |        |         |
| ILMN_9883   | CYB561  | 52.410   | 309.759  | 315.083  | -2.563 | 2.2E-34 | -2.588 | 4.1E-07 |
| ILMN_28843  | CYBASC3 | 816.654  | 1422.440 | 955.285  | -0.801 | 8.2E-03 |        |         |
| ILMN_711    | CYP2U1  | 74.603   | 128.818  | 120.466  | -0.788 | 3.5E-02 |        |         |
| ILMN_6966   | CYSLTR1 | 126.839  | 386.159  | 201.853  | -1.606 | 7.5E-06 |        |         |
| ILMN_9299   | D4S234E | 65.091   | 520.106  | 964.760  | -2.998 | 2.2E-34 | -3.890 | 2.6E-34 |
| ILMN_24457  | DBN1    | 59.482   | 42.110   | 309.819  |        |         | -2.381 | 2.8E-02 |
| ILMN_25837  | DERL3   | 21.462   | 53.089   | 20.892   | -1.307 | 7.7E-03 |        |         |
| ILMN_22993  | DOCK6   | 21.663   | 13.718   | 1.033    |        |         | 4.391  | 4.5E-02 |
| ILMN_21820  | DOK2    | 94.141   | 37.815   | 39.344   | 1.316  | 1.6E-04 | 1.259  | 7.6E-04 |
| ILMN_137779 | DOK2    | 661.790  | 327.899  | 297.466  | 1.013  | 9.0E-03 | 1.154  | 8.0E-05 |
| ILMN_26881  | DSCR1L2 | 267.136  | 147.704  | 130.317  | 0.855  | 7.6E-03 | 1.036  | 4.7E-04 |
| ILMN_12340  | DUSP16  | 582.527  | 485.759  | 309.691  |        |         | 0.911  | 2.9E-02 |
| ILMN_11097  | DUSP4   | 449.770  | 98.291   | 155.752  | 2.194  | 1.6E-02 |        |         |
| ILMN_17249  | E2F5    | 214.253  | 554.619  | 179.544  | -1.372 | 9.1E-03 |        |         |
| ILMN_7978   | EAF1    | 119.225  | 80.234   | 49.393   |        |         | 1.271  | 1.7E-04 |
| ILMN_27934  | EBF     | 27.309   | 188.948  | 21.261   | -2.791 | 2.5E-11 |        |         |
| ILMN_5986   | EBI2    | 1666.472 | 3275.493 | 2138.783 | -0.975 | 2.3E-03 |        |         |
| ILMN_29351  | EDAR    | 107.653  | 103.508  | 228.887  |        |         | -1.088 | 4.5E-03 |
| ILMN_14235  | EFHC1   | 15.339   | 41.250   | 33.163   | -1.427 | 1.9E-02 |        |         |
| ILMN_22990  | EIF2C4  | 39.358   | 77.625   | 87.477   | -0.980 | 1.9E-02 | -1.152 | 1.0E-02 |
| ILMN_9781   | ELOVL4  | 35.834   | 170.753  | 131.361  | -2.253 | 1.1E-02 | -1.874 | 4.2E-04 |
| ILMN_19998  | EOMES   | 59.598   | 204.715  | 2150.807 |        |         | -5.173 | 2.7E-12 |
| ILMN_21869  | EPHA4   | 87.669   | 341.960  | 286.177  | -1.964 | 1.3E-02 |        |         |
| ILMN_7247   | ETV6    | 434.029  | 710.966  | 572.147  | -0.712 | 3.7E-02 |        |         |
| ILMN_26505  | EVI2B   | 1576.656 | 3188.820 | 2433.941 | -1.016 | 3.6E-05 |        |         |
| ILMN_20896  | EZH2    | 137.628  | 75.294   | 105.720  | 0.870  | 1.3E-02 |        |         |
| ILMN_25961  | F2R     | 13.618   | 48.150   | 147.830  | -1.822 | 7.8E-04 | -3.440 | 1.7E-04 |

|             |              |          |          |          |        |         |        |         |
|-------------|--------------|----------|----------|----------|--------|---------|--------|---------|
| ILMN_18681  | FADS3        | 192.083  | 471.912  | 176.653  | -1.297 | 1.5E-07 |        |         |
| ILMN_25614  | FAM112A      | 34.415   | 7.878    | 7.559    | 2.127  | 5.1E-03 | 2.187  | 6.5E-03 |
| ILMN_10067  | FAM13A1      | 269.720  | 61.702   | 38.131   | 2.128  | 2.7E-04 | 2.822  | 1.3E-05 |
| ILMN_3091   | FAM3C        | 106.179  | 235.167  | 158.383  | -1.147 | 1.9E-05 |        |         |
| ILMN_7706   | FAM46C       | 1443.884 | 1035.765 | 717.556  |        |         | 1.009  | 6.8E-03 |
| ILMN_6949   | FASLG        | 12.909   | 51.260   | 136.596  | -1.989 | 2.7E-03 | -3.403 | 1.5E-02 |
| ILMN_12030  | FCER2        | 26.535   | 143.727  | 68.539   | -2.437 | 6.7E-04 |        |         |
| ILMN_139282 | FCGR2B       | 33.118   | 112.853  | 28.499   | -1.769 | 1.6E-02 |        |         |
| ILMN_8487   | FCRL1        | 83.581   | 420.085  | 86.282   | -2.329 | 2.5E-12 |        |         |
| ILMN_2802   | FCRL2        | 16.337   | 49.370   | 9.840    | -1.595 | 1.9E-02 |        |         |
| ILMN_2355   | FCRL6        | 116.278  | 124.103  | 305.906  |        |         | -1.396 | 6.1E-03 |
| ILMN_2598   | FCRLM1       | 472.591  | 2371.092 | 446.606  | -2.327 | 1.8E-06 |        |         |
| ILMN_24322  | FCRLM2       | 45.985   | 110.468  | 62.730   | -1.264 | 1.6E-04 |        |         |
| ILMN_14451  | FHL3         | 195.374  | 95.886   | 131.724  | 1.027  | 9.6E-03 |        |         |
| ILMN_25398  | FLJ14213     | 31.327   | 112.436  | 260.761  | -1.844 | 2.3E-02 | -3.057 | 4.6E-02 |
| ILMN_2666   | FLJ33641     | 62.608   | 378.818  | 95.256   | -2.597 | 1.3E-04 |        |         |
| ILMN_15357  | FLJ35695     | 49.583   | 10.652   | 3.257    | 2.219  | 2.4E-02 | 3.928  | 2.1E-03 |
| ILMN_28347  | FLJ37440     | 527.901  | 393.289  | 291.138  |        |         | 0.859  | 1.8E-02 |
| ILMN_4408   | FLJ37464     | 230.245  | 82.819   | 97.984   | 1.475  | 6.7E-08 | 1.233  | 6.2E-04 |
| ILMN_36156  | FLJ40311     | 124.288  | 68.028   | 64.063   | 0.869  | 1.5E-02 | 0.956  | 1.4E-02 |
| ILMN_4754   | FLT3LG       | 863.438  | 384.326  | 391.812  | 1.168  | 2.5E-04 | 1.140  | 7.9E-04 |
| ILMN_7622   | FOXP3        | 83.501   | 22.307   | 18.534   | 1.904  | 3.7E-07 | 2.172  | 9.7E-08 |
| ILMN_3766   | FXYD2        | 80.305   | 17.702   | 22.227   | 2.182  | 1.4E-04 | 1.853  | 1.7E-03 |
| ILMN_21207  | GAB3         | 66.206   | 176.650  | 230.853  | -1.416 | 8.9E-07 | -1.802 | 3.1E-06 |
| ILMN_17355  | GADD45A      | 416.398  | 196.389  | 93.740   |        |         | 2.151  | 2.7E-02 |
| ILMN_8597   | GALNAC4S-6ST | 156.534  | 485.331  | 229.374  | -1.632 | 4.7E-02 |        |         |
| ILMN_21972  | GATM         | 19.147   | 85.224   | 27.542   | -2.154 | 3.8E-04 |        |         |
| ILMN_18761  | GCAT         | 25.190   | 41.955   | 66.557   |        |         | -1.402 | 1.5E-02 |
| ILMN_21048  | GCET2        | 37.428   | 94.239   | 99.362   | -1.332 | 2.2E-04 | -1.409 | 3.0E-02 |
| ILMN_17617  | GFOD1        | 94.510   | 192.829  | 225.115  | -1.029 | 6.2E-03 |        |         |
| ILMN_17168  | GGA2         | 767.765  | 1258.293 | 989.421  | -0.713 | 1.3E-02 |        |         |
| ILMN_27010  | GIMAP5       | 3036.203 | 4580.928 | 5970.573 |        |         | -0.976 | 3.0E-03 |
| ILMN_6869   | GIMAP8       | 505.530  | 1111.909 | 1482.565 | -1.137 | 3.3E-06 | -1.552 | 2.0E-07 |
| ILMN_14068  | GJB6         | 84.942   | 11.622   | 7.329    | 2.870  | 2.8E-03 | 3.535  | 1.3E-03 |
| ILMN_3517   | GLIPR1       | 527.389  | 1040.979 | 769.796  | -0.981 | 8.3E-04 |        |         |
| ILMN_20255  | GMNN         | 63.602   | 42.849   | 28.289   |        |         | 1.169  | 2.2E-02 |

|             |          |          |          |          |        |         |        |         |
|-------------|----------|----------|----------|----------|--------|---------|--------|---------|
| ILMN_5207   | GNG2     | 583.155  | 353.657  | 338.814  |        |         | 0.783  | 4.1E-02 |
| ILMN_22105  | GNG7     | 123.657  | 593.738  | 232.581  | -2.263 | 2.5E-09 |        |         |
| ILMN_25463  | GNG8     | 155.735  | 30.855   | 61.391   | 2.336  | 9.1E-04 |        |         |
| ILMN_17459  | GNLY     | 56.742   | 221.986  | 1458.938 |        |         | -4.684 | 7.3E-03 |
| ILMN_5374   | GNPTAB   | 1022.734 | 628.733  | 756.443  | 0.702  | 1.7E-02 |        |         |
| ILMN_28767  | GPHN     | 169.205  | 110.457  | 83.222   |        |         | 1.024  | 2.5E-02 |
| ILMN_16884  | GPR18    | 358.746  | 824.444  | 747.765  | -1.200 | 7.5E-03 |        |         |
| ILMN_20675  | GPR19    | 294.123  | 198.412  | 168.174  |        |         | 0.806  | 4.4E-02 |
| ILMN_22986  | GPR55    | 198.552  | 73.987   | 69.944   | 1.424  | 1.0E-06 | 1.505  | 2.6E-07 |
| ILMN_9790   | GRAMD3   | 351.428  | 125.787  | 201.191  | 1.482  | 1.5E-03 |        |         |
| ILMN_23069  | GSTM2    | 82.198   | 84.824   | 182.836  |        |         | -1.153 | 1.2E-02 |
| ILMN_21648  | GZMA     | 325.202  | 716.532  | 4536.577 |        |         | -3.802 | 2.6E-34 |
| ILMN_10868  | GZMK     | 257.697  | 655.419  | 3450.359 |        |         | -3.743 | 2.6E-34 |
| ILMN_46681  | HIP1R    | 360.747  | 589.609  | 602.086  | -0.709 | 1.7E-02 |        |         |
| ILMN_23615  | HIP1R    | 445.731  | 769.829  | 762.243  | -0.788 | 1.0E-02 |        |         |
| ILMN_29690  | HIPK2    | 355.197  | 521.250  | 692.749  |        |         | -0.964 | 2.6E-03 |
| ILMN_27857  | HLA-DOA  | 263.381  | 775.537  | 387.178  | -1.558 | 3.6E-02 |        |         |
| ILMN_7656   | HLA-DOB  | 209.207  | 838.542  | 267.959  | -2.003 | 3.3E-05 |        |         |
| ILMN_41173  | HLA-DQA1 | 1878.223 | 4709.952 | 1831.013 | -1.326 | 3.3E-02 |        |         |
| ILMN_1899   | HOP      | 23.447   | 83.915   | 134.174  | -1.840 | 1.6E-04 | -2.517 | 6.3E-03 |
| ILMN_27069  | HPSE     | 222.473  | 116.931  | 88.342   | 0.928  | 1.5E-03 | 1.332  | 3.7E-06 |
| ILMN_6623   | HSPA1A   | 539.442  | 309.383  | 201.228  | 0.802  | 5.0E-02 | 1.423  | 5.2E-08 |
| ILMN_12918  | ICA1     | 484.600  | 281.076  | 307.219  | 0.786  | 9.3E-04 | 0.658  | 9.1E-09 |
| ILMN_28481  | ID2      | 601.663  | 828.027  | 1629.703 |        |         | -1.438 | 8.2E-04 |
| ILMN_15068  | IFNAR2   | 1199.353 | 843.829  | 720.692  |        |         | 0.735  | 2.0E-02 |
| ILMN_23930  | IGJ      | 356.246  | 1475.186 | 651.562  | -2.050 | 5.6E-03 |        |         |
| ILMN_32659  | IGSF9B   | 140.843  | 55.994   | 71.609   | 1.331  | 2.9E-03 |        |         |
| ILMN_16803  | IL15     | 87.404   | 279.734  | 188.994  | -1.678 | 6.5E-04 |        |         |
| ILMN_16084  | IL18RAP  | 349.082  | 349.348  | 1291.105 |        |         | -1.887 | 1.0E-04 |
| ILMN_24627  | IL2RA    | 2103.915 | 180.697  | 154.578  | 3.541  | 4.0E-08 | 3.767  | 8.4E-08 |
| ILMN_19931  | IL2RB    | 5469.442 | 2362.487 | 3579.670 | 1.211  | 8.3E-06 |        |         |
| ILMN_3781   | IL32     | 1983.743 | 1148.536 | 1044.043 | 0.788  | 3.6E-03 | 0.926  | 6.6E-04 |
| ILMN_1393   | IL7      | 42.009   | 35.923   | 1.282    |        |         | 5.034  | 1.0E-02 |
| ILMN_137414 | IL7R     | 2767.264 | 7596.756 | 8349.401 | -1.457 | 1.9E-08 | -1.593 | 3.3E-07 |
| ILMN_10513  | IL7R     | 81.223   | 279.894  | 294.977  | -1.785 | 2.2E-02 | -1.861 | 3.3E-02 |
| ILMN_6860   | INCA     | 86.600   | 36.286   | 16.404   |        |         | 2.400  | 2.2E-03 |

|             |           |          |          |          |        |         |        |         |
|-------------|-----------|----------|----------|----------|--------|---------|--------|---------|
| ILMN_22637  | INPP4B    | 598.797  | 473.261  | 353.025  |        |         | 0.762  | 1.6E-02 |
| ILMN_12414  | IRF4      | 126.506  | 80.794   | 44.982   |        |         | 1.492  | 4.9E-04 |
| ILMN_20480  | IRF8      | 715.928  | 2409.573 | 926.898  | -1.751 | 2.2E-04 |        |         |
| ILMN_14503  | IRS2      | 423.316  | 355.372  | 253.530  |        |         | 0.740  | 4.7E-02 |
| ILMN_11930  | KCNH3     | 86.361   | 35.526   | 48.517   | 1.281  | 2.0E-03 |        |         |
| ILMN_29015  | KIAA0040  | 248.415  | 175.243  | 123.883  |        |         | 1.004  | 3.6E-02 |
| ILMN_6408   | KIAA0125  | 77.457   | 500.524  | 105.153  | -2.692 | 8.3E-13 |        |         |
| ILMN_21473  | KIAA0513  | 222.184  | 356.796  | 390.927  | -0.683 | 3.6E-02 | -0.815 | 2.5E-02 |
| ILMN_5957   | KIAA0746  | 1526.467 | 2442.800 | 1666.634 | -0.678 | 1.9E-02 |        |         |
| ILMN_42090  | KIAA1671  | 29.124   | 111.710  | 325.633  | -1.939 | 2.3E-03 | -3.483 | 2.3E-10 |
| ILMN_19059  | KIAA1913  | 31.097   | 183.224  | 110.754  | -2.559 | 4.0E-05 |        |         |
| ILMN_21165  | KLF11     | 171.917  | 126.448  | 92.699   |        |         | 0.891  | 1.0E-02 |
| ILMN_24870  | KLHL2     | 250.069  | 150.501  | 130.771  | 0.733  | 2.6E-02 | 0.935  | 2.8E-03 |
| ILMN_25774  | KLRB1     | 694.377  | 1770.898 | 1633.274 | -1.351 | 1.7E-02 |        |         |
| ILMN_15508  | KLRD1     | 29.333   | 95.885   | 819.386  | -1.709 | 1.3E-02 | -4.804 | 1.4E-07 |
| ILMN_12613  | KLRG1     | 221.787  | 345.786  | 788.889  |        |         | -1.831 | 3.7E-06 |
| ILMN_29874  | KLRK1     | 44.965   | 202.701  | 1377.603 | -2.172 | 2.2E-03 | -4.937 | 2.6E-34 |
| ILMN_10994  | KMO       | 35.600   | 129.508  | 50.234   | -1.863 | 8.8E-03 |        |         |
| ILMN_16684  | KSP37     | 21.238   | 99.675   | 1178.639 |        |         | -5.794 | 2.5E-02 |
| ILMN_12588  | LAMA5     | 30.744   | 238.345  | 36.816   | -2.955 | 9.6E-07 |        |         |
| ILMN_13848  | LAMC1     | 28.468   | 99.453   | 33.674   | -1.805 | 3.9E-03 |        |         |
| ILMN_3642   | LAMC3     | 215.758  | 38.851   | 50.677   | 2.473  | 5.2E-04 | 2.090  | 2.9E-03 |
| ILMN_28310  | LASS6     | 362.084  | 561.673  | 1018.568 |        |         | -1.492 | 3.2E-05 |
| ILMN_137018 | LAT2      | 103.888  | 263.781  | 127.807  | -1.344 | 1.1E-02 |        |         |
| ILMN_15062  | LAYN      | 251.125  | 17.761   | 36.038   | 3.822  | 3.8E-05 | 2.801  | 6.6E-04 |
| ILMN_6603   | LIMA1     | 320.338  | 185.820  | 210.052  | 0.786  | 8.8E-03 |        |         |
| ILMN_18779  | LIMS2     | 165.584  | 84.382   | 98.272   | 0.973  | 2.9E-03 |        |         |
| ILMN_20151  | LMCD1     | 83.689   | 26.383   | 16.490   | 1.665  | 1.1E-03 | 2.343  | 6.6E-05 |
| ILMN_5796   | LMO4      | 333.435  | 899.909  | 572.852  | -1.432 | 5.4E-05 |        |         |
| ILMN_37516  | LOC144481 | 39.730   | 4.838    | 2.774    | 3.038  | 9.8E-03 | 3.840  | 5.4E-03 |
| ILMN_11861  | LOC152485 | 145.549  | 185.809  | 360.275  |        |         | -1.308 | 6.2E-04 |
| ILMN_6140   | LOC201895 | 795.079  | 1464.354 | 859.757  | -0.881 | 1.5E-03 |        |         |
| ILMN_12575  | LOC285908 | 71.119   | 92.271   | 150.946  |        |         | -1.086 | 2.3E-02 |
| ILMN_37634  | LOC338758 | 391.149  | 713.492  | 535.419  | -0.867 | 3.6E-02 |        |         |
| ILMN_9164   | LOC349136 | 19.799   | 93.946   | 90.443   | -2.246 | 3.0E-03 | -2.192 | 3.7E-06 |
| ILMN_18133  | LOC388692 | 59.185   | 82.998   | 147.066  |        |         | -1.313 | 1.4E-02 |

|             |           |          |          |          |        |         |        |         |
|-------------|-----------|----------|----------|----------|--------|---------|--------|---------|
| ILMN_36916  | LOC389599 | 105.579  | 49.240   | 44.609   | 1.100  | 2.2E-02 | 1.243  | 7.9E-03 |
| ILMN_43464  | LOC440667 | 599.238  | 977.945  | 977.952  | -0.707 | 1.5E-02 |        |         |
| ILMN_33812  | LOC440816 | 309.773  | 183.997  | 167.059  | 0.752  | 4.7E-02 | 0.891  | 1.3E-02 |
| ILMN_44140  | LOC642113 | 847.466  | 3243.221 | 1124.000 | -1.936 | 1.7E-02 |        |         |
| ILMN_37967  | LOC647450 | 442.663  | 1705.449 | 659.253  | -1.946 | 2.3E-02 |        |         |
| ILMN_35193  | LOC652314 | 41.043   | 14.782   | 2.766    |        |         | 3.891  | 2.1E-03 |
| ILMN_35426  | LOC652479 | 12.515   | 72.029   | 9.622    | -2.525 | 1.9E-02 |        |         |
| ILMN_37502  | LOC652493 | 650.502  | 2467.112 | 834.725  | -1.923 | 9.1E-04 |        |         |
| ILMN_32875  | LOC652694 | 121.374  | 611.588  | 212.278  | -2.333 | 1.6E-02 |        |         |
| ILMN_39274  | LOC652775 | 25.634   | 149.318  | 68.161   | -2.542 | 5.8E-04 |        |         |
| ILMN_137005 | LOC653613 | 62.883   | 6.370    | 4.445    |        |         | 3.822  | 4.6E-02 |
| ILMN_10080  | LOC90925  | 29.580   | 142.565  | 39.042   | -2.269 | 4.6E-12 |        |         |
| ILMN_3858   | LOC92691  | 87.236   | 48.302   | 41.288   |        |         | 1.079  | 8.2E-03 |
| ILMN_12017  | LPHN1     | 142.999  | 154.313  | 251.030  |        |         | -0.812 | 3.9E-02 |
| ILMN_9813   | LRMP      | 535.489  | 1329.810 | 932.435  | -1.312 | 1.1E-07 |        |         |
| ILMN_2030   | LRP8      | 334.017  | 166.319  | 205.636  | 1.006  | 6.9E-04 |        |         |
| ILMN_3568   | LRRC32    | 279.981  | 21.216   | 15.202   | 3.722  | 1.3E-04 | 4.203  | 1.0E-04 |
| ILMN_3542   | LTB       | 7414.759 | 5044.913 | 4244.387 |        |         | 0.805  | 9.4E-03 |
| ILMN_10044  | LXN       | 377.579  | 294.537  | 202.228  |        |         | 0.901  | 2.8E-03 |
| ILMN_12433  | LY86      | 381.458  | 1191.426 | 461.876  | -1.643 | 8.2E-03 |        |         |
| ILMN_22187  | LY9       | 937.597  | 1486.306 | 1741.077 |        |         | -0.893 | 9.4E-03 |
| ILMN_9328   | MAD1L1    | 1183.890 | 724.938  | 672.193  | 0.708  | 1.5E-02 | 0.817  | 5.6E-03 |
| ILMN_3411   | MAL       | 900.405  | 535.857  | 578.129  | 0.749  | 3.7E-02 |        |         |
| ILMN_534    | MAPK13    | 1293.200 | 848.932  | 794.722  |        |         | 0.702  | 3.3E-02 |
| ILMN_6222   | MCOLN2    | 304.204  | 874.736  | 794.687  | -1.524 | 5.0E-05 |        |         |
| ILMN_19661  | MEF2C     | 30.942   | 185.445  | 57.947   | -2.583 | 1.2E-05 |        |         |
| ILMN_17595  | MELL1     | 44.678   | 11.186   | 12.888   | 1.998  | 1.6E-03 | 1.794  | 3.1E-03 |
| ILMN_15572  | MGC15619  | 191.696  | 500.189  | 207.979  | -1.384 | 3.0E-08 |        |         |
| ILMN_137903 | MGC23909  | 49.120   | 41.293   | 19.760   |        |         | 1.314  | 3.3E-02 |
| ILMN_28832  | MGC33556  | 353.124  | 501.796  | 767.110  |        |         | -1.119 | 4.2E-03 |
| ILMN_15940  | MGC33839  | 18.258   | 27.918   | 57.711   |        |         | -1.660 | 3.1E-02 |
| ILMN_38785  | MGC39372  | 34.572   | 110.118  | 74.769   | -1.671 | 2.4E-07 |        |         |
| ILMN_5164   | MIB1      | 61.049   | 51.364   | 29.268   |        |         | 1.061  | 4.6E-02 |
| ILMN_4207   | MMD       | 792.435  | 451.935  | 403.776  | 0.810  | 2.8E-03 | 0.973  | 4.0E-04 |
| ILMN_25898  | MOSPD1    | 231.780  | 156.779  | 125.456  |        |         | 0.886  | 6.6E-03 |
| ILMN_23782  | MTHFD2    | 518.373  | 295.775  | 245.134  | 0.809  | 2.4E-02 | 1.080  | 1.2E-03 |



|             |         |          |          |          |        |         |        |         |
|-------------|---------|----------|----------|----------|--------|---------|--------|---------|
| ILMN_7083   | MTSS1   | 66.466   | 264.557  | 158.000  | -1.993 | 8.3E-11 | -1.249 | 4.2E-03 |
| ILMN_19846  | MUC1    | 651.773  | 219.583  | 188.373  | 1.570  | 7.5E-06 | 1.791  | 4.3E-06 |
| ILMN_8912   | MYO1G   | 2173.604 | 1276.744 | 1161.193 | 0.768  | 3.2E-02 | 0.904  | 1.2E-02 |
| ILMN_20154  | MYO5C   | 154.286  | 56.967   | 19.830   |        |         | 2.960  | 5.8E-05 |
| ILMN_138327 | NAPSB   | 129.559  | 610.797  | 93.287   | -2.237 | 3.1E-03 |        |         |
| ILMN_13197  | NCALD   | 170.874  | 144.440  | 325.372  |        |         | -0.929 | 1.4E-02 |
| ILMN_7892   | NCF4    | 326.732  | 321.721  | 135.967  |        |         | 1.265  | 2.8E-02 |
| ILMN_19702  | NCR3    | 1637.706 | 830.480  | 997.091  | 0.980  | 3.3E-04 |        |         |
| ILMN_24220  | NDRG1   | 1515.369 | 933.874  | 851.312  | 0.698  | 1.6E-02 | 0.832  | 4.0E-03 |
| ILMN_28709  | NELF    | 651.125  | 325.363  | 327.763  | 1.001  | 5.2E-04 | 0.990  | 5.2E-03 |
| ILMN_26383  | NELL2   | 96.512   | 1148.425 | 2711.836 | -3.573 | 8.1E-08 | -4.812 | 2.6E-34 |
| ILMN_15943  | NKG7    | 167.384  | 394.866  | 3950.502 |        |         | -4.561 | 4.6E-03 |
| ILMN_18267  | NOS3    | 76.060   | 40.711   | 38.415   |        |         | 0.985  | 3.8E-02 |
| ILMN_14871  | NUDT8   | 232.655  | 130.687  | 151.443  | 0.832  | 6.4E-03 |        |         |
| ILMN_20212  | OBFC2A  | 1417.505 | 1084.309 | 878.600  |        |         | 0.690  | 4.0E-02 |
| ILMN_11112  | OSBPL10 | 64.740   | 562.522  | 56.010   | -3.119 | 8.3E-13 |        |         |
| ILMN_6779   | OSBPL5  | 46.581   | 57.489   | 242.235  |        |         | -2.379 | 2.4E-10 |
| ILMN_13137  | OSM     | 1499.826 | 503.158  | 250.030  |        |         | 2.585  | 3.7E-03 |
| ILMN_1964   | PACSIN1 | 17.042   | 15.753   | 56.380   |        |         | -1.726 | 8.8E-03 |
| ILMN_19873  | PASK    | 470.772  | 1753.878 | 1823.818 |        |         | -1.954 | 3.5E-02 |
| ILMN_18537  | PAWR    | 19.359   | 58.079   | 21.796   | -1.585 | 3.5E-04 |        |         |
| ILMN_22596  | PCAF    | 2698.441 | 1710.434 | 1606.503 | 0.658  | 3.0E-02 | 0.748  | 1.4E-02 |
| ILMN_6597   | PCSK5   | 105.869  | 123.154  | 199.565  |        |         | -0.915 | 1.6E-02 |
| ILMN_138594 | PDE4B   | 443.996  | 271.518  | 167.920  |        |         | 1.403  | 2.6E-03 |
| ILMN_6142   | PDLIM1  | 56.836   | 377.810  | 104.721  | -2.733 | 1.4E-12 |        |         |
| ILMN_11771  | PELI1   | 632.486  | 374.773  | 264.614  | 0.755  | 8.5E-03 | 1.257  | 1.3E-06 |
| ILMN_1531   | PFN2    | 43.154   | 80.019   | 72.991   | -0.891 | 8.5E-03 |        |         |
| ILMN_12419  | PFTK1   | 70.899   | 247.885  | 57.268   | -1.806 | 1.6E-02 |        |         |
| ILMN_13666  | PHTF2   | 275.081  | 219.828  | 126.532  |        |         | 1.120  | 5.5E-03 |
| ILMN_21964  | PIM1    | 9363.224 | 5017.442 | 5291.682 | 0.900  | 2.8E-04 | 0.823  | 3.8E-03 |
| ILMN_12660  | PITPNC1 | 239.111  | 316.614  | 574.553  |        |         | -1.265 | 1.5E-03 |
| ILMN_17006  | PKIG    | 30.051   | 96.609   | 26.376   | -1.685 | 1.2E-04 |        |         |
| ILMN_3773   | PLCG1   | 1371.776 | 883.455  | 1280.237 | 0.635  | 4.7E-02 |        |         |
| ILMN_27072  | PLCG2   | 419.235  | 1277.263 | 517.028  | -1.607 | 2.9E-03 |        |         |
| ILMN_16440  | PLCL1   | 157.189  | 92.438   | 59.986   |        |         | 1.390  | 6.6E-05 |
| ILMN_26768  | PLEKHF2 | 225.943  | 408.518  | 181.658  | -0.854 | 1.5E-02 |        |         |

|             |           |          |          |          |        |         |        |         |
|-------------|-----------|----------|----------|----------|--------|---------|--------|---------|
| ILMN_28109  | PLEKHG3   | 198.087  | 490.660  | 507.854  | -1.309 | 6.1E-04 | -1.358 | 8.0E-03 |
| ILMN_28497  | PLEKHK1   | 276.266  | 60.930   | 9.995    | 2.181  | 4.6E-02 | 4.789  | 1.8E-03 |
| ILMN_23081  | PLEKHO1   | 762.937  | 1198.029 | 907.412  | -0.651 | 3.5E-02 |        |         |
| ILMN_1153   | PLSCR3    | 235.410  | 147.629  | 133.242  |        |         | 0.821  | 1.8E-02 |
| ILMN_8865   | PLXDC1    | 22.800   | 54.001   | 104.773  |        |         | -2.200 | 9.5E-03 |
| ILMN_22628  | PLXNB1    | 82.839   | 32.914   | 32.556   |        |         | 1.347  | 4.8E-02 |
| ILMN_14800  | PNOC      | 54.674   | 233.188  | 70.207   | -2.093 | 5.4E-03 |        |         |
| ILMN_19978  | POU2AF1   | 62.260   | 378.870  | 64.063   | -2.605 | 1.3E-08 |        |         |
| ILMN_1833   | PPAPDC1B  | 161.905  | 263.655  | 169.984  | -0.704 | 3.6E-02 |        |         |
| ILMN_11092  | PPM2C     | 564.982  | 408.943  | 293.474  |        |         | 0.945  | 2.6E-03 |
| ILMN_9487   | PPP1R3F   | 301.388  | 139.673  | 167.180  | 1.110  | 2.6E-05 | 0.850  | 7.6E-03 |
| ILMN_22013  | PRDM8     | 333.805  | 242.139  | 157.175  |        |         | 1.087  | 4.7E-03 |
| ILMN_28175  | PRF1      | 835.645  | 488.211  | 2574.397 | 0.775  | 1.3E-02 |        |         |
| ILMN_6622   | PTGER2    | 935.362  | 441.205  | 253.778  |        |         | 1.882  | 2.8E-03 |
| ILMN_20899  | PTK2      | 105.981  | 305.048  | 227.004  | -1.525 | 5.0E-03 |        |         |
| ILMN_137280 | PTPLA     | 211.969  | 81.000   | 48.883   | 1.388  | 8.8E-03 | 2.116  | 5.2E-05 |
| ILMN_11067  | PTTG1     | 693.461  | 313.313  | 323.924  | 1.146  | 9.5E-03 |        |         |
| ILMN_10834  | RAB11FIP1 | 212.095  | 114.783  | 99.488   | 0.886  | 1.1E-02 | 1.092  | 6.2E-04 |
| ILMN_3988   | RAB11FIP1 | 108.200  | 62.034   | 49.405   |        |         | 1.131  | 2.8E-03 |
| ILMN_24051  | RAB6IP1   | 609.538  | 1093.392 | 1291.272 |        |         | -1.083 | 3.4E-03 |
| ILMN_19038  | RAG1AP1   | 2039.630 | 1185.735 | 885.948  | 0.783  | 3.3E-03 | 1.203  | 1.8E-06 |
| ILMN_17213  | RALGPS2   | 13.369   | 71.147   | 20.238   | -2.412 | 3.9E-06 |        |         |
| ILMN_24486  | RAPGEF3   | 18.990   | 53.642   | 20.883   | -1.498 | 4.5E-02 |        |         |
| ILMN_14106  | RASGEF1A  | 15.917   | 67.210   | 73.794   | -2.078 | 3.6E-03 | -2.213 | 3.8E-04 |
| ILMN_25102  | RBL2      | 1949.495 | 2335.487 | 3423.340 |        |         | -0.812 | 4.2E-02 |
| ILMN_18726  | RBMS1     | 24.544   | 66.051   | 63.985   | -1.428 | 4.5E-02 |        |         |
| ILMN_34353  | RGAG4     | 27.020   | 80.471   | 56.260   | -1.574 | 1.6E-05 |        |         |
| ILMN_16445  | RGS16     | 373.577  | 313.446  | 118.526  |        |         | 1.656  | 7.8E-06 |
| ILMN_14714  | RHBDF2    | 576.530  | 1221.844 | 901.130  | -1.084 | 1.8E-03 |        |         |
| ILMN_19962  | RHPN2     | 29.800   | 69.887   | 46.803   | -1.230 | 1.3E-02 |        |         |
| ILMN_7339   | RNF157    | 201.137  | 108.719  | 146.151  | 0.888  | 2.6E-02 |        |         |
| ILMN_11976  | SAMD3     | 253.728  | 257.494  | 794.714  |        |         | -1.647 | 1.1E-02 |
| ILMN_17752  | SAMHD1    | 133.933  | 79.971   | 70.205   |        |         | 0.932  | 1.1E-02 |
| ILMN_7778   | SAMSN1    | 1203.507 | 1055.556 | 616.268  |        |         | 0.966  | 2.7E-02 |
| ILMN_15731  | SAV1      | 243.957  | 410.956  | 236.569  | -0.752 | 1.1E-02 |        |         |
| ILMN_23730  | SCRN1     | 106.616  | 277.258  | 161.908  | -1.379 | 1.5E-03 |        |         |

|             |            |          |          |          |        |         |        |         |
|-------------|------------|----------|----------|----------|--------|---------|--------|---------|
| ILMN_138968 | SDCCAG33   | 388.324  | 482.230  | 668.366  |        |         | -0.783 | 2.9E-02 |
| ILMN_17072  | SEC31L2    | 388.214  | 200.929  | 338.401  | 0.950  | 4.1E-02 |        |         |
| ILMN_25026  | SEMA4B     | 122.841  | 314.979  | 155.327  | -1.358 | 1.3E-04 |        |         |
| ILMN_24615  | SEMA4D     | 2629.743 | 3150.985 | 4375.370 |        |         | -0.734 | 4.1E-02 |
| ILMN_29190  | SERINC5    | 22.463   | 36.798   | 76.544   |        |         | -1.769 | 1.3E-02 |
| ILMN_7089   | SERPINI1   | 109.324  | 99.508   | 55.503   |        |         | 0.978  | 1.1E-02 |
| ILMN_11604  | SES3       | 74.868   | 31.935   | 16.096   | 1.229  | 9.4E-03 | 2.218  | 2.2E-05 |
| ILMN_4036   | SETBP1     | 36.012   | 181.172  | 53.062   | -2.331 | 4.8E-11 |        |         |
| ILMN_13165  | SGCE       | 16.884   | 99.075   | 36.672   | -2.553 | 3.3E-09 |        |         |
| ILMN_9531   | SGPP1      | 2303.146 | 2087.099 | 1446.486 |        |         | 0.671  | 4.9E-02 |
| ILMN_139087 | SGPP2      | 237.224  | 165.090  | 81.625   |        |         | 1.539  | 2.4E-03 |
| ILMN_19915  | SHMT2      | 3298.744 | 2089.739 | 1530.581 | 0.659  | 2.9E-02 | 1.108  | 1.3E-05 |
| ILMN_26592  | SIRPB2     | 173.414  | 89.733   | 153.743  | 0.951  | 6.9E-03 |        |         |
| ILMN_3886   | SIRPB2     | 554.485  | 319.851  | 486.282  | 0.794  | 7.3E-03 |        |         |
| ILMN_10688  | SLC6A16    | 89.813   | 192.233  | 140.526  | -1.098 | 9.3E-05 |        |         |
| ILMN_3183   | SLCO4A1    | 263.230  | 116.114  | 80.224   |        |         | 1.714  | 1.6E-04 |
| ILMN_17467  | SLCO4C1    | 12.375   | 22.574   | 44.213   |        |         | -1.837 | 9.5E-03 |
| ILMN_8262   | SMAD5      | 166.973  | 462.309  | 331.654  | -1.469 | 4.0E-09 | -0.990 | 3.2E-03 |
| ILMN_20096  | SMARCB1    | 413.490  | 679.030  | 417.395  | -0.716 | 2.3E-02 |        |         |
| ILMN_4851   | SOCS2      | 745.689  | 129.411  | 48.039   | 2.527  | 3.2E-02 | 3.956  | 6.7E-03 |
| ILMN_20138  | SOX13      | 42.691   | 119.968  | 151.786  | -1.491 | 3.3E-03 | -1.830 | 3.4E-03 |
| ILMN_30180  | SOX8       | 223.579  | 441.250  | 498.858  |        |         | -1.158 | 1.4E-02 |
| ILMN_8737   | SPIB       | 108.451  | 492.504  | 75.242   | -2.183 | 2.9E-07 |        |         |
| ILMN_1974   | ST3GAL1    | 1021.391 | 1366.550 | 1761.170 |        |         | -0.786 | 2.2E-02 |
| ILMN_15305  | ST6GALNAC2 | 30.481   | 70.797   | 56.876   | -1.216 | 2.3E-02 |        |         |
| ILMN_2957   | STAM       | 955.300  | 518.578  | 329.701  | 0.881  | 1.5E-03 | 1.535  | 1.7E-09 |
| ILMN_1387   | STAMBPL1   | 1683.040 | 1147.231 | 1038.900 |        |         | 0.696  | 3.5E-02 |
| ILMN_136955 | STAP2      | 47.876   | 15.942   | 25.607   | 1.586  | 4.2E-03 |        |         |
| ILMN_20263  | STK17A     | 17.699   | 40.303   | 65.931   |        |         | -1.897 | 1.4E-04 |
| ILMN_17469  | STOM       | 624.597  | 1222.299 | 1542.499 |        |         | -1.304 | 1.0E-03 |
| ILMN_19056  | SUHW2      | 70.258   | 126.590  | 150.895  | -0.849 | 4.3E-02 | -1.103 | 6.8E-03 |
| ILMN_25326  | SUOX       | 634.326  | 253.340  | 200.136  | 1.324  | 1.0E-07 | 1.664  | 4.2E-09 |
| ILMN_4104   | SWAP70     | 421.860  | 952.082  | 248.930  | -1.174 | 9.6E-03 |        |         |
| ILMN_30143  | SYP        | 35.601   | 7.920    | 8.726    | 2.168  | 3.0E-02 |        |         |
| ILMN_20095  | SYTL2      | 48.518   | 112.965  | 182.149  | -1.219 | 1.2E-04 | -1.909 | 3.8E-06 |
| ILMN_25716  | TARP       | 89.271   | 179.591  | 863.083  |        |         | -3.273 | 1.0E-05 |

|             |                 |          |          |          |        |         |        |         |
|-------------|-----------------|----------|----------|----------|--------|---------|--------|---------|
| ILMN_25527  | TBC1D9          | 40.037   | 196.758  | 20.292   | -2.297 | 2.8E-06 |        |         |
| ILMN_27218  | TCEA3           | 1432.904 | 863.794  | 805.868  | 0.730  | 1.7E-02 | 0.830  | 6.8E-03 |
| ILMN_4452   | TEAD2           | 23.074   | 78.434   | 10.159   | -1.765 | 3.2E-02 |        |         |
| ILMN_19387  | TFEB            | 26.194   | 57.265   | 27.154   | -1.128 | 2.0E-02 |        |         |
| ILMN_22189  | TGFBR2          | 835.850  | 1264.118 | 1499.335 |        |         | -0.843 | 2.6E-02 |
| ILMN_22620  | TGFBR3          | 331.587  | 591.693  | 999.479  |        |         | -1.592 | 1.5E-02 |
| ILMN_17969  | THOC3           | 92.175   | 71.589   | 39.361   |        |         | 1.228  | 2.6E-03 |
| ILMN_12372  | TJP3            | 703.640  | 379.508  | 323.927  | 0.891  | 3.2E-02 | 1.119  | 4.5E-03 |
| ILMN_10669  | TLE1            | 59.575   | 160.607  | 72.882   | -1.431 | 2.2E-03 |        |         |
| ILMN_6615   | TLR10           | 97.785   | 574.070  | 95.383   | -2.554 | 1.4E-12 |        |         |
| ILMN_15638  | TLR6            | 27.878   | 79.617   | 25.128   | -1.514 | 1.7E-03 |        |         |
| ILMN_5498   | TLR9            | 55.031   | 107.130  | 48.222   | -0.961 | 1.1E-02 |        |         |
| ILMN_14479  | TMEM110         | 70.115   | 39.296   | 28.132   |        |         | 1.318  | 1.1E-02 |
| ILMN_4901   | TMEM71          | 504.526  | 1107.549 | 1265.615 | -1.134 | 2.5E-06 | -1.327 | 6.9E-06 |
| ILMN_13834  | TMEPAI          | 63.832   | 131.555  | 96.891   | -1.043 | 4.9E-02 |        |         |
| ILMN_1052   | TMOD1           | 87.792   | 65.159   | 36.404   |        |         | 1.270  | 3.2E-02 |
| ILMN_22155  | TNFRSF13C       | 77.258   | 216.235  | 65.337   | -1.485 | 4.3E-08 |        |         |
| ILMN_22838  | TNFRSF18 (GITR) | 226.473  | 36.019   | 41.881   | 2.652  | 2.7E-02 |        |         |
| ILMN_19893  | TNFRSF1B        | 4965.262 | 2176.612 | 1882.186 | 1.190  | 4.3E-07 | 1.399  | 1.3E-07 |
| ILMN_16587  | TOX             | 91.169   | 42.160   | 52.684   | 1.113  | 6.2E-03 |        |         |
| ILMN_5543   | TPD52L1         | 51.048   | 15.213   | 8.902    | 1.747  | 4.2E-04 | 2.520  | 6.9E-06 |
| ILMN_5830   | TRAF1           | 306.177  | 186.518  | 204.633  | 0.715  | 3.2E-02 |        |         |
| ILMN_17008  | TSPAN13         | 31.437   | 241.065  | 59.248   | -2.939 | 3.0E-12 |        |         |
| ILMN_2453   | TSPAN3          | 664.798  | 1324.774 | 939.575  | -0.995 | 1.2E-03 |        |         |
| ILMN_8032   | TSPAN5          | 155.691  | 101.339  | 84.758   |        |         | 0.877  | 1.5E-02 |
| ILMN_23448  | TTC21A          | 54.436   | 121.934  | 70.153   | -1.163 | 3.0E-02 |        |         |
| ILMN_12202  | TUFT1           | 200.307  | 143.382  | 115.394  |        |         | 0.796  | 2.8E-02 |
| ILMN_7381   | TXLNB           | 28.930   | 67.462   | 19.694   | -1.222 | 4.4E-02 |        |         |
| ILMN_20654  | UAP1L1          | 435.389  | 246.951  | 298.003  | 0.818  | 1.3E-02 |        |         |
| ILMN_654    | UBQLN2          | 1391.161 | 861.098  | 796.543  |        |         | 0.804  | 2.2E-02 |
| ILMN_28400  | UBTF            | 143.919  | 188.143  | 250.296  |        |         | -0.798 | 4.7E-02 |
| ILMN_24416  | UGP2            | 650.271  | 379.066  | 300.876  | 0.779  | 1.4E-04 | 1.112  | 3.3E-04 |
| ILMN_16188  | UNQ5783         | 75.429   | 209.668  | 89.747   | -1.475 | 1.3E-02 |        |         |
| ILMN_13470  | UST             | 53.149   | 160.056  | 101.901  | -1.590 | 9.1E-07 |        |         |
| ILMN_139375 | VAMP4           | 286.505  | 212.564  | 164.379  |        |         | 0.802  | 9.9E-03 |
| ILMN_14200  | VAV2            | 63.061   | 157.943  | 77.025   | -1.325 | 9.0E-06 |        |         |

|             |         |         |          |         |        |         |        |         |
|-------------|---------|---------|----------|---------|--------|---------|--------|---------|
| ILMN_22390  | VAV3    | 394.062 | 216.238  | 137.878 | 0.866  | 3.2E-02 | 1.515  | 8.0E-05 |
| ILMN_27565  | VIPR1   | 123.700 | 219.391  | 308.326 |        |         | -1.318 | 3.2E-02 |
| ILMN_2270   | VPREB3  | 289.723 | 2756.625 | 411.621 | -3.250 | 1.3E-05 |        |         |
| ILMN_10614  | WNT7A   | 34.934  | 88.386   | 82.773  | -1.339 | 4.8E-02 |        |         |
| ILMN_17127  | YWHAB   | 372.109 | 306.333  | 226.667 |        |         | 0.715  | 4.6E-02 |
| ILMN_22581  | ZDHC23  | 137.128 | 116.777  | 66.846  |        |         | 1.037  | 3.5E-02 |
| ILMN_5174   | ZNF218  | 139.317 | 304.493  | 581.656 | -1.128 | 2.3E-02 |        |         |
| ILMN_7933   | ZNF342  | 323.639 | 665.965  | 345.301 | -1.041 | 4.4E-03 |        |         |
| ILMN_28956  | ZNF609  | 86.389  | 102.643  | 168.206 |        |         | -0.961 | 1.4E-02 |
| ILMN_2307   | ZNF683  | 28.098  | 111.764  | 522.876 |        |         | -4.218 | 6.6E-05 |
| ILMN_21768  | ZNFN1A4 | 684.776 | 107.764  | 68.731  | 2.668  | 7.1E-17 | 3.317  | 1.7E-20 |
| ILMN_89369  |         | 428.991 | 81.612   | 86.186  | 2.394  | 1.1E-03 | 2.315  | 2.6E-03 |
| ILMN_89918  |         | 67.414  | 30.060   | 31.831  | 1.165  | 6.8E-03 | 1.083  | 2.5E-02 |
| ILMN_79580  |         | 75.103  | 35.288   | 33.027  | 1.090  | 7.9E-03 | 1.185  | 7.3E-03 |
| ILMN_110599 |         | 107.271 | 58.002   | 45.223  | 0.887  | 3.3E-02 | 1.246  | 1.2E-03 |
| ILMN_123683 |         | 216.277 | 124.280  | 170.747 | 0.799  | 1.7E-02 |        |         |
| ILMN_117456 |         | 220.643 | 391.772  | 232.045 | -0.828 | 2.6E-02 |        |         |
| ILMN_128287 |         | 451.667 | 831.584  | 638.888 | -0.881 | 4.1E-02 |        |         |
| ILMN_70828  |         | 189.395 | 408.752  | 271.045 | -1.110 | 1.5E-05 |        |         |
| ILMN_71472  |         | 15.702  | 39.394   | 12.290  | -1.327 | 4.7E-02 |        |         |
| ILMN_110801 |         | 18.388  | 52.841   | 33.685  | -1.523 | 1.5E-02 |        |         |
| ILMN_71954  |         | 17.621  | 87.371   | 106.954 | -2.310 | 2.6E-02 | -2.602 | 3.7E-03 |
| ILMN_73404  |         | 30.035  | 158.906  | 207.380 | -2.403 | 8.3E-13 | -2.788 | 1.7E-04 |
| ILMN_84303  |         | 28.377  | 205.299  | 40.216  | -2.855 | 2.2E-34 |        |         |
| ILMN_117157 |         | 44.151  | 343.718  | 359.786 | -2.961 | 8.7E-04 |        |         |
| ILMN_80852  |         | 31.882  | 359.329  | 43.052  | -3.494 | 2.2E-34 |        |         |
| ILMN_105242 |         | 76.575  | 7.761    | 1.781   |        |         | 5.426  | 4.6E-02 |
| ILMN_96745  |         | 105.312 | 69.779   | 50.170  |        |         | 1.070  | 2.7E-02 |
| ILMN_119658 |         | 220.424 | 169.551  | 127.045 |        |         | 0.795  | 4.6E-02 |
| ILMN_70875  |         | 336.172 | 255.961  | 198.686 |        |         | 0.759  | 2.7E-02 |
| ILMN_89485  |         | 271.323 | 424.699  | 507.637 |        |         | -0.904 | 6.8E-03 |
| ILMN_80172  |         | 26.665  | 53.085   | 70.807  |        |         | -1.409 | 3.3E-03 |
| ILMN_75484  |         | 14.815  | 27.329   | 45.654  |        |         | -1.624 | 1.6E-02 |
| ILMN_75987  |         | 37.577  | 86.182   | 121.672 |        |         | -1.695 | 1.2E-03 |

**Table S1-B (P6 vs P7)**

Filtered for differential P value (Diff Pval) <0.05 and fold change >1.5 (Log2FC > 0.585 or <-0.585).

All genes shown here have a detection P value <0.001 for at least P6

| TargetID   | SYMBOL    | 5        | AVG_Sign <sup>2</sup> 6 | AVG_Sign <sup>2</sup> 7 | AVG_Sign <sup>2</sup> 8 | P6/P7 Log <sub>2</sub> FC | Diff Pval |
|------------|-----------|----------|-------------------------|-------------------------|-------------------------|---------------------------|-----------|
| ILMN_7395  | ABCB1     | 26.98669 | 226.998                 | 523.7731                |                         | -1.206                    | 1.5E-04   |
| ILMN_12727 | ADAM19    | 1223.915 | 2034.971                | 1110.179                |                         | 0.874                     | 1.9E-02   |
| ILMN_4121  | ADAM28    | 9.586886 | 77.86831                | 14.32857                |                         | 2.442                     | 1.6E-02   |
| ILMN_14814 | ADAM28    | 23.21457 | 71.47896                | 18.26466                |                         | 1.968                     | 9.4E-03   |
| ILMN_25998 | AFF3      | 67.11906 | 127.1718                | 26.98569                |                         | 2.237                     | 2.0E-05   |
| ILMN_2997  | ALOX5     | 581.3074 | 1911.899                | 552.5931                |                         | 1.791                     | 3.0E-03   |
| ILMN_2504  | AOAH      | 45.08434 | 89.49037                | 306.1667                |                         | -1.775                    | 3.3E-07   |
| ILMN_4001  | APBA2     | 52.63112 | 58.12161                | 196.8026                |                         | -1.760                    | 2.8E-04   |
| ILMN_23772 | ARHGAP24  | 32.51532 | 115.7059                | 19.30997                |                         | 2.583                     | 7.4E-04   |
| ILMN_14697 | BACE2     | 33.57959 | 71.4373                 | 14.65807                |                         | 2.285                     | 1.3E-05   |
| ILMN_25922 | BANK1     | 231.6503 | 1617.786                | 212.3819                |                         | 2.929                     | 3.3E-07   |
| ILMN_17359 | BCL11A    | 72.84441 | 293.3732                | 77.5554                 |                         | 1.919                     | 6.8E-03   |
| ILMN_25971 | BCL11A    | 19.78169 | 106.6215                | 19.61187                |                         | 2.443                     | 6.3E-05   |
| ILMN_3868  | BCL2      | 2399.929 | 983.7138                | 504.923                 |                         | 0.962                     | 4.9E-04   |
| ILMN_26827 | BCNP1     | 20.65281 | 118.59                  | 23.54675                |                         | 2.332                     | 7.8E-04   |
| ILMN_23414 | BLK       | 120.4985 | 684.4351                | 142.6355                |                         | 2.263                     | 3.3E-07   |
| ILMN_10290 | BLNK      | 84.31991 | 405.1768                | 67.08655                |                         | 2.594                     | 6.1E-03   |
| ILMN_27589 | BLR1      | 24.08441 | 83.69763                | 20.09501                |                         | 2.058                     | 6.2E-04   |
| ILMN_19896 | BLR1      | 386.1952 | 1109.996                | 424.7338                |                         | 1.386                     | 4.4E-05   |
| ILMN_16249 | BMF       | 78.69151 | 161.6012                | 63.25476                |                         | 1.353                     | 6.1E-04   |
| ILMN_31945 | C10orf128 | 88.81499 | 109.9357                | 46.09138                |                         | 1.254                     | 3.3E-02   |
| ILMN_19053 | C13orf18  | 111.4838 | 440.9854                | 69.3783                 |                         | 2.668                     | 3.7E-04   |
| ILMN_28059 | C3orf54   | 101.0316 | 294.0752                | 88.5838                 |                         | 1.731                     | 1.3E-05   |
| ILMN_13979 | C8orf70   | 268.9497 | 157.5672                | 60.19978                |                         | 1.388                     | 6.3E-05   |
| ILMN_20760 | C9orf28   | 109.3889 | 144.9354                | 310.4065                |                         | -1.099                    | 1.0E-03   |
| ILMN_11754 | CBFA2T3   | 35.00335 | 124.8248                | 17.98508                |                         | 2.795                     | 5.7E-05   |
| ILMN_22732 | CCL5      | 115.78   | 639.4009                | 3487.436                |                         | -2.447                    | 8.8E-06   |
| ILMN_10201 | CCNG2     | 74.4697  | 91.63487                | 42.38627                |                         | 1.112                     | 9.5E-03   |
| ILMN_2004  | CD19      | 389.4615 | 2025.985                | 404.7204                |                         | 2.324                     | 1.6E-03   |

|             |             |          |          |          |        |         |
|-------------|-------------|----------|----------|----------|--------|---------|
| ILMN_25152  | CD1C        | 56.95211 | 73.3205  | 15.21261 | 2.269  | 3.5E-02 |
| ILMN_926    | CD1D        | 64.92323 | 223.1746 | 38.3138  | 2.542  | 4.3E-02 |
| ILMN_28723  | CD24        | 32.7933  | 99.87142 | 9.332069 | 3.420  | 8.6E-03 |
| ILMN_137396 | CD79A       | 472.7108 | 2551.681 | 585.8177 | 2.123  | 4.8E-03 |
| ILMN_138839 | CD79B       | 604.9412 | 1728.919 | 471.3504 | 1.875  | 1.5E-03 |
| ILMN_139125 | CD79B       | 646.8466 | 2149.299 | 460.4628 | 2.223  | 7.7E-06 |
| ILMN_24367  | CD82        | 315.9751 | 563.6811 | 341.9156 | 0.721  | 4.6E-02 |
| ILMN_24985  | CD82        | 135.0997 | 235.3805 | 127.7666 | 0.881  | 4.5E-02 |
| ILMN_27064  | CD86        | 4.943338 | 52.9508  | 5.667865 | 3.224  | 6.8E-04 |
| ILMN_2358   | CD8A        | 141.1822 | 359.7022 | 2515.448 | -2.806 | 1.1E-04 |
| ILMN_137981 | CD8B1       | 24.93475 | 59.20693 | 430.1052 | -2.861 | 4.9E-02 |
| ILMN_12678  | COBLL1      | 116.4497 | 684.1362 | 87.06932 | 2.974  | 9.9E-05 |
| ILMN_7401   | COCH        | 31.53934 | 182.0603 | 19.7803  | 3.202  | 2.7E-04 |
| ILMN_26147  | CPNE5       | 19.76726 | 128.656  | 20.98038 | 2.616  | 6.1E-04 |
| ILMN_24458  | CST7        | 423.0988 | 352.305  | 1996.513 | -2.503 | 4.8E-04 |
| ILMN_4961   | CTSW        | 289.2353 | 229.0201 | 1019.696 | -2.155 | 1.1E-03 |
| ILMN_2029   | CXCR3       | 494.5414 | 354.5434 | 699.3088 | -0.980 | 3.7E-03 |
| ILMN_14583  | CXCR6       | 234.8627 | 117.9262 | 248.904  | -1.078 | 3.5E-02 |
| ILMN_6966   | CYSLTR1     | 126.8385 | 386.1591 | 201.8529 | 0.936  | 1.2E-02 |
| ILMN_9299   | D4S234E     | 65.09116 | 520.1062 | 964.7597 | -0.891 | 1.6E-02 |
| ILMN_24457  | DBN1        | 59.48174 | 42.11021 | 309.8191 | -2.879 | 1.5E-02 |
| ILMN_13426  | DCAL1       | 225.189  | 577.2856 | 111.6758 | 2.370  | 1.0E-03 |
| ILMN_25837  | DERL3       | 21.46237 | 53.08885 | 20.89221 | 1.345  | 4.9E-02 |
| ILMN_11830  | DKFZP434B03 | 510.2143 | 352.7026 | 607.1423 | -0.784 | 4.6E-02 |
| ILMN_28506  | DKFZP564O0  | 2.908103 | 77.29057 | 9.465574 | 3.030  | 2.7E-03 |
| ILMN_17249  | E2F5        | 214.2527 | 554.6194 | 179.5441 | 1.627  | 2.0E-02 |
| ILMN_27934  | EBF         | 27.30872 | 188.9479 | 21.26083 | 3.152  | 7.6E-10 |
| ILMN_29351  | EDAR        | 107.6532 | 103.5076 | 228.8868 | -1.145 | 1.2E-02 |
| ILMN_14422  | EDG8        | 3.49219  | 6.38123  | 43.557   | -2.771 | 2.5E-02 |
| ILMN_19998  | EOMES       | 59.59779 | 204.7145 | 2150.807 | -3.393 | 7.6E-10 |
| ILMN_25961  | F2R         | 13.61798 | 48.14991 | 147.8299 | -1.618 | 4.9E-02 |
| ILMN_18681  | FADS3       | 192.0828 | 471.9116 | 176.6526 | 1.418  | 1.5E-07 |
| ILMN_27581  | FCGR2B      | 77.13184 | 243.749  | 56.11108 | 2.119  | 1.6E-02 |
| ILMN_139282 | FCGR2B      | 33.11807 | 112.8527 | 28.49879 | 1.985  | 1.6E-02 |
| ILMN_8487   | FCRL1       | 83.58086 | 420.0847 | 86.28168 | 2.284  | 6.8E-04 |
| ILMN_2802   | FCRL2       | 16.33736 | 49.3699  | 9.839579 | 2.327  | 8.5E-04 |

|            |           |          |          |          |        |         |
|------------|-----------|----------|----------|----------|--------|---------|
| ILMN_2355  | FCRL6     | 116.2781 | 124.1026 | 305.9058 | -1.302 | 1.7E-02 |
| ILMN_2598  | FCRLM1    | 472.5913 | 2371.092 | 446.6064 | 2.408  | 2.2E-03 |
| ILMN_625   | FLJ33590  | 5.430062 | 10.78013 | 63.55027 | -2.560 | 1.7E-02 |
| ILMN_21972 | GATM      | 19.14722 | 85.22402 | 27.54239 | 1.630  | 1.9E-02 |
| ILMN_22105 | GNG7      | 123.6574 | 593.7375 | 232.5811 | 1.352  | 5.0E-02 |
| ILMN_6771  | GPC2      | 333.8614 | 189.5135 | 362.3087 | -0.935 | 4.9E-02 |
| ILMN_13759 | GPR30     | 1.901067 | 24.78376 | 3.28862  | 2.914  | 4.6E-02 |
| ILMN_21648 | GZMA      | 325.2017 | 716.5315 | 4536.577 | -2.663 | 2.5E-10 |
| ILMN_10868 | GZMK      | 257.6969 | 655.4189 | 3450.359 | -2.396 | 2.5E-10 |
| ILMN_528   | GZMM      | 494.6092 | 390.0401 | 851.1016 | -1.126 | 4.1E-04 |
| ILMN_7656  | HLA-DOB   | 209.2071 | 838.5417 | 267.9594 | 1.646  | 1.8E-02 |
| ILMN_9421  | HRK       | 10.6406  | 29.77032 | 5.901351 | 2.335  | 1.6E-02 |
| ILMN_18737 | IER5      | 562.6078 | 712.2974 | 414.4996 | 0.781  | 3.8E-02 |
| ILMN_16084 | IL18RAP   | 349.082  | 349.3477 | 1291.105 | -1.886 | 9.2E-08 |
| ILMN_1393  | IL7       | 42.00857 | 35.92274 | 1.281939 | 4.808  | 3.5E-05 |
| ILMN_30033 | ILDR1     | 4.280469 | 31.24882 | 1.00769  | 4.955  | 1.7E-04 |
| ILMN_23329 | KBTBD8    | 245.8141 | 317.452  | 154.312  | 1.041  | 1.0E-03 |
| ILMN_6408  | KIAA0125  | 77.45701 | 500.5241 | 105.1527 | 2.251  | 1.5E-04 |
| ILMN_42090 | KIAA1671  | 29.12393 | 111.7099 | 325.6332 | -1.543 | 4.3E-04 |
| ILMN_29548 | KIR3DL2   | 9.417846 | 44.85507 | 155.0719 | -1.790 | 4.6E-04 |
| ILMN_22647 | KLHL14    | 22.28907 | 55.75026 | 12.42314 | 2.166  | 1.6E-02 |
| ILMN_15508 | KLRD1     | 29.33331 | 95.88458 | 819.386  | -3.095 | 8.2E-06 |
| ILMN_3762  | KLRD1     | 10.28247 | 48.4246  | 376.9945 | -2.961 | 1.0E-07 |
| ILMN_12613 | KLRG1     | 221.7872 | 345.7864 | 788.8894 | -1.190 | 4.1E-03 |
| ILMN_29874 | KLRK1     | 44.96463 | 202.7012 | 1377.603 | -2.765 | 1.0E-12 |
| ILMN_12588 | LAMA5     | 30.7438  | 238.3451 | 36.81572 | 2.695  | 1.6E-04 |
| ILMN_14813 | LDLRAP1   | 861.4796 | 656.8682 | 1203.189 | -0.873 | 4.5E-02 |
| ILMN_11861 | LOC152485 | 145.549  | 185.8089 | 360.2747 | -0.955 | 3.2E-02 |
| ILMN_43020 | LOC642083 | 10.53132 | 21.54634 | 144.4884 | -2.745 | 8.0E-03 |
| ILMN_35426 | LOC652479 | 12.51512 | 72.02941 | 9.622305 | 2.904  | 3.1E-02 |
| ILMN_37887 | LOC652495 | 12.43754 | 42.01048 | 6.665674 | 2.656  | 1.5E-02 |
| ILMN_10080 | LOC90925  | 29.57969 | 142.5646 | 39.04216 | 1.869  | 6.8E-03 |
| ILMN_30563 | LOC96597  | 10.70831 | 34.33628 | 5.253508 | 2.708  | 1.2E-02 |
| ILMN_18317 | LYL1      | 345.7633 | 492.0148 | 225.2681 | 1.127  | 6.1E-04 |
| ILMN_25648 | MOXD1     | 4.927917 | 45.36032 | 11.35672 | 1.998  | 3.4E-02 |
| ILMN_16607 | MRPL44    | 525.3169 | 650.6722 | 342.2065 | 0.927  | 4.0E-02 |



|             |          |           |          |          |        |         |
|-------------|----------|-----------|----------|----------|--------|---------|
| ILMN_138327 | NAPSB    | 129.5593  | 610.7974 | 93.28719 | 2.711  | 1.4E-02 |
| ILMN_13197  | NCALD    | 170.8737  | 144.44   | 325.3719 | -1.172 | 4.7E-03 |
| ILMN_7892   | NCF4     | 326.7323  | 321.7205 | 135.9671 | 1.243  | 3.1E-04 |
| ILMN_22054  | NEFL     | 13.89887  | 43.50558 | 7.510345 | 2.534  | 9.3E-04 |
| ILMN_26383  | NELL2    | 96.51234  | 1148.425 | 2711.836 | -1.240 | 6.1E-04 |
| ILMN_15943  | NKG7     | 167.3843  | 394.8659 | 3950.502 | -3.323 | 1.9E-02 |
| ILMN_22430  | NLGN2    | 118.4023  | 100.0605 | 189.4064 | -0.921 | 4.0E-02 |
| ILMN_11112  | OSBPL10  | 64.73992  | 562.5221 | 56.01047 | 3.328  | 1.5E-09 |
| ILMN_6779   | OSBPL5   | 46.5806   | 57.48899 | 242.2347 | -2.075 | 2.8E-08 |
| ILMN_1964   | PACSIN1  | 17.04206  | 15.75339 | 56.3797  | -1.840 | 3.7E-03 |
| ILMN_26264  | PADI4    | 222.4703  | 95.70482 | 279.5522 | -1.546 | 2.5E-02 |
| ILMN_18537  | PAWR     | 19.35922  | 58.07887 | 21.79588 | 1.414  | 5.0E-03 |
| ILMN_12419  | PFTK1    | 70.89871  | 247.8845 | 57.26787 | 2.114  | 4.9E-02 |
| ILMN_3092   | PHF16    | 67.89634  | 179.0865 | 41.50765 | 2.109  | 1.3E-02 |
| ILMN_17006  | PKIG     | 30.05081  | 96.6092  | 26.37622 | 1.873  | 2.7E-03 |
| ILMN_26768  | PLEKHF2  | 225.9431  | 408.5175 | 181.6576 | 1.169  | 7.4E-04 |
| ILMN_5055   | PLEKHG1  | 18.29797  | 37.7717  | 5.866124 | 2.687  | 2.1E-02 |
| ILMN_19978  | POU2AF1  | 62.26002  | 378.8703 | 64.0631  | 2.564  | 6.3E-05 |
| ILMN_28175  | PRF1     | 835.6448  | 488.2111 | 2574.397 | -2.399 | 2.0E-02 |
| ILMN_17213  | RALGPS2  | 13.36852  | 71.14671 | 20.23835 | 1.814  | 5.4E-04 |
| ILMN_24988  | ROBO3    | 134.919   | 96.66065 | 197.3031 | -1.029 | 1.7E-02 |
| ILMN_5844   | SAMD3    | 82.08922  | 72.65669 | 190.8041 | -1.393 | 4.5E-02 |
| ILMN_11976  | SAMD3    | 253.7279  | 257.4944 | 794.7143 | -1.626 | 6.9E-03 |
| ILMN_15731  | SAV1     | 243.9568  | 410.9555 | 236.5688 | 0.797  | 1.7E-02 |
| ILMN_4036   | SETBP1   | 36.01228  | 181.1719 | 53.06151 | 1.772  | 3.9E-04 |
| ILMN_13165  | SGCE     | 16.88373  | 99.07541 | 36.67199 | 1.434  | 3.8E-02 |
| ILMN_139087 | SGPP2    | 237.2235  | 165.0896 | 81.625   | 1.016  | 2.7E-02 |
| ILMN_26163  | SIGLEC10 | 33.44723  | 86.32544 | 21.42886 | 2.010  | 4.6E-02 |
| ILMN_4948   | SNX2     | 1303.572  | 1885.713 | 1135.909 | 0.731  | 2.8E-02 |
| ILMN_10699  | SNX22    | 11.30405  | 145.6247 | 25.90266 | 2.491  | 1.7E-03 |
| ILMN_8737   | SPIB     | 108.4513  | 492.5035 | 75.24216 | 2.711  | 1.9E-05 |
| ILMN_20454  | SSPN     | 0.4411635 | 30.1521  | 3.730882 | 3.015  | 2.7E-03 |
| ILMN_4104   | SWAP70   | 421.8596  | 952.0818 | 248.9297 | 1.935  | 3.7E-04 |
| ILMN_25716  | TARP     | 89.27134  | 179.591  | 863.0831 | -2.265 | 5.2E-04 |
| ILMN_25527  | TBC1D9   | 40.03749  | 196.7576 | 20.29191 | 3.277  | 7.6E-08 |
| ILMN_12126  | TCF4     | 77.5225   | 224.8937 | 25.47723 | 3.142  | 1.0E-04 |

|             |           |          |          |          |        |         |
|-------------|-----------|----------|----------|----------|--------|---------|
| ILMN_4452   | TEAD2     | 23.07381 | 78.43377 | 10.15872 | 2.949  | 2.8E-04 |
| ILMN_6615   | TLR10     | 97.78497 | 574.0702 | 95.3828  | 2.589  | 6.3E-05 |
| ILMN_15638  | TLR6      | 27.87836 | 79.6167  | 25.12817 | 1.664  | 1.2E-03 |
| ILMN_9141   | TNFRSF13B | 291.9844 | 686.8109 | 58.93271 | 3.543  | 3.1E-04 |
| ILMN_22155  | TNFRSF13C | 77.25778 | 216.2353 | 65.33711 | 1.727  | 1.5E-06 |
| ILMN_17008  | TSPAN13   | 31.43728 | 241.0647 | 59.24751 | 2.025  | 3.0E-02 |
| ILMN_7381   | TXLNB     | 28.92967 | 67.46201 | 19.69412 | 1.776  | 4.1E-03 |
| ILMN_2270   | VPREB3    | 289.7226 | 2756.625 | 411.621  | 2.744  | 6.9E-03 |
| ILMN_2617   | ZBTB32    | 158.2236 | 160.3056 | 47.38394 | 1.758  | 1.0E-03 |
| ILMN_18125  | ZNF532    | 67.67209 | 120.5137 | 36.58043 | 1.720  | 1.6E-04 |
| ILMN_2307   | ZNF683    | 28.09775 | 111.7637 | 522.876  | -2.226 | 1.1E-02 |
| ILMN_27976  | ZP1       | 11.47074 | 30.71755 | 3.265282 | 3.234  | 1.7E-02 |
| ILMN_71472  |           | 15.70207 | 39.39441 | 12.29034 | 1.680  | 2.6E-02 |
| ILMN_113570 |           | 1.919014 | 23.98393 | 1.889118 | 3.666  | 2.2E-02 |
| ILMN_125061 |           | 23.17259 | 48.20243 | 15.57411 | 1.630  | 7.8E-03 |
| ILMN_84303  |           | 28.37741 | 205.2989 | 40.21601 | 2.352  | 2.2E-06 |
| ILMN_80852  |           | 31.88198 | 359.3287 | 43.05152 | 3.061  | 5.4E-11 |
