# Supplementary material for: Analysis of FOXP3+ Regulatory T Cells That Display Apparent Viral Antigen Specificity during Chronic Hepatitis C Virus Infection
Source: PubMed Central journal article supplement (PMC2791198; doi:10.1371/journal.ppat.1000707), 2009-12-24
Supplement: ppat.1000707.s002.pdf [file ppat.1000707.s002.pdf]

**Table S2. NS3 peptide array used in the current study** (supplied by BEI Resources, ATCC, Manassas Virginia, USA)

A) NS3 peptides of genotype 3a

| <i>ID</i> | <i>Sequence</i>     | <i>ID</i> | <i>Sequence</i>    | <i>ID</i> | <i>Sequence</i>     |
|-----------|---------------------|-----------|--------------------|-----------|---------------------|
| 1         | APITAYAQQTRGLLGTIV  | 34        | KVPAAYVAQGYNVLVL   | 67        | CNVAVEQYVDFSLDPTF   |
| 2         | AQQTRGLLGTIVTSLTGR  | 35        | YVAQGYNVLVLNPSVAA  | 68        | EQYVDFSLDPTFSIETCTA |
| 3         | LGTIVTSLTGRDKNVVA   | 36        | NVLVLNPSVAATLGFSGF | 69        | DPTFSIETCTAPQDAVSR  |
| 4         | SLTGRDKNVAGEVQVL    | 37        | SVAATLGFSGFMSRAYGI | 70        | TCTAPQDAVSRSQRRGR   |
| 5         | KNVVAGEVQVLSTATQTF  | 38        | FGSFMSRAYGIDPNIR   | 71        | DAVSRSQRRGRTGRGRL   |
| 6         | VQVLSTATQTFLGTTV    | 39        | SRAYGIDPNIRTGNRTV  | 72        | SQRRGRTGRGRLGTYRYV  |
| 7         | TATQTFLGTTVGGVMWTV  | 40        | DPNIRTGNRTVTTGAKL  | 73        | GRGRLGTYRYVTPGER    |
| 8         | GTTVGGVMWTVYHGAGSR  | 41        | GNRTVTTGAKLTYSTYK  | 74        | GTYRYVTPGERPSGMF    |
| 9         | MWTVYHGAGSRTLAVKH   | 42        | GAKLTYSTYKFLAGGGC  | 75        | VTPGERPSGMFDSVVL    |
| 10        | AGSRTLAVKHPALQMY    | 43        | TYGFLAGGGCSGGAYDV  | 76        | RPSGMFDSVVLCECYDA   |
| 11        | AGVKHPALQMYTNVDQDL  | 44        | GGGCSGGAYDVICDDCH  | 77        | DSVVLCECYDAGCSWYDL  |
| 12        | LQMYTNVDQDLVGWPA    | 45        | AYDVICDDCHAQDATSI  | 78        | CYDAGCSWYDLQPAETTV  |
| 13        | NVDQDLVGWPAPPGAKSL  | 46        | DDCHAQDATSILGIGTVL | 79        | WYDLQPAETTVRLRAYL   |
| 14        | GWPAPPGAKSLEPCTCGSA | 47        | ATSILGIGTVLDQAETA  | 80        | AETTVRLRAYLSTPGLPV  |
| 15        | KSLEPCTCGSADLYLVTR  | 48        | IGTVLDQAETAGVRLTVL | 81        | RAYLSTPGLPVCQDHLDL  |
| 16        | CGSADLYLVTRDADVIPA  | 49        | AETAGVRLTVLATATPPG | 82        | GLPVCQDHLDLWESVF    |
| 17        | LVTRDADVIPARRRGDSTA | 50        | LTVLATATPPGSITVPH  | 83        | CQDHLDLWESVFTGLTHI  |
| 18        | IPARRRGDSTASLLSPR   | 51        | ATPPGSITVPHSNIEEVA | 84        | WESVFTGLTHIDAHFL    |
| 19        | GDSTASLLSPRPLARLK   | 52        | TVPHSNIEEVALGSEGEI | 85        | TGLTHIDAHFLSQTQKA   |
| 20        | LLSPRPLARLKGSSGGPV  | 53        | EEVALGSEGEIPFYGKAI | 86        | DAHFLSQTQKAGLNFSYL  |
| 21        | ARLKGSSGGPVMCPSGHV  | 54        | EGEIPFYGKAIPACIK   | 87        | TKQAGLNFSYLTAYQATV  |
| 22        | GGPVMCPSGHVAGIFRAA  | 55        | YGKAIPACIKGGRHLIF  | 88        | FSYLTAYQATVCARAQA   |
| 23        | SGHVAGIFRAAVCTRGVA  | 56        | ACIKGGRHLIFCHSKKK  | 89        | YQATVCARAQAPPPSW    |
| 24        | FRAAVCTRGVAKALQFI   | 57        | RHLIFCHSKKKCDKMASK | 90        | CARAQAPPPSWDETWKCL  |
| 25        | TRGVAKALQFIPVETL    | 58        | SKKKCDKMASKLRGMGL  | 91        | PPSWDETWKCLVRLKPTL  |
| 26        | KALQFIPVETLSTQAR    | 59        | KMASKLRGMGLNAVAYYR | 92        | WKCLVRLKPTLHGPTPLL  |
| 27        | IPVETLSTQARSPSF     | 60        | GMGLNAVAYYRGLDVSVI | 93        | KPTLHGPTPLLYRLGPV   |
| 28        | TLSTQARSPSFSDNSTPPA | 61        | AYYRGLDVSVIPTTGDVV | 94        | PTPLLYRLGPVQNEICL   |
| 29        | PSFSDNSTPPAVPQSYQV  | 62        | VSVIPTTGDVVVCATDAL | 95        | RLGPVQNEICLTHPITKY  |
| 30        | TPPAVPQSYQVGYLHA    | 63        | GDVVVCATDALMTGF    | 96        | EICLTHPITKYVMACMSA  |
| 31        | PQSYQVGYLHAPTGSBK   | 64        | VCATDALMTGFTGDFDSV | 97        | ITKYVMACMSADLEVTT   |
| 32        | GYLHAPTGSBKSTKVPAA  | 65        | MTGFTGDFDSVIDCNVAV |           |                     |
| 33        | GSGKSTKVPAAAYVAQGY  | 66        | FDSVIDCNVAVEQYVDF  |           |                     |

## B) NS3 peptides of GT1a

| <i>ID</i> | <i>Sequence</i>     | <i>ID</i> | <i>Sequence</i>     | <i>ID</i> | <i>Sequence</i>     |
|-----------|---------------------|-----------|---------------------|-----------|---------------------|
| 1         | DGMVSKGWRLAPITAYA   | 32        | AHLHAPTGSKGSTKVPAA  | 63        | GFTGDFDSVIDCNTCVTQ  |
| 2         | WRLAPITAYAQQTRGLL   | 33        | GSGKSTKVPAAAYAAQGYK | 64        | SVIDCNTCVTQTVDFSLD  |
| 3         | TAYAQQTRGLLGCIITSL  | 34        | VPAAYAAQGYKVLVLNPS  | 65        | CVTQTVDFSLDPTFTIET  |
| 4         | RGLLGCIITSLTGRDKNQ  | 35        | QGYKVLVLNPSVAATLGF  | 66        | FSLDPTFTIETTLPQDA   |
| 5         | ITSLTGRDKNQVEGEVQI  | 36        | LNPSVAATLGFAYMSKA   | 67        | TIETTLPQDAVSRTQRR   |
| 6         | DKNQVEGEVQIVSTATQT  | 37        | TLGFAYMSKAHGVDPN    | 68        | PQDAVSRTQRRGRTGRGK  |
| 7         | EVQIVSTATQTFLAT     | 38        | MSKAHGVDPNIRTGVRTI  | 69        | TQRRGRTGRGKPGIYRFV  |
| 8         | VSTATQTFLATCIN      | 39        | DPNIRTGVRTIITGSPIT  | 70        | GRGKPGIYRFVAPGERPS  |
| 9         | ATQTFLATCINGVCWTVY  | 40        | VRTIITGSPITYSTYGKF  | 71        | YRFVAPGERPSGMFDSSV  |
| 10        | TCINGVCWTVYHGAGTRT  | 41        | SPITYSTYGKFLADGGCS  | 72        | ERPSGMFDSSVLCECYDA  |
| 11        | WTVYHGAGTRTIASPKGP  | 42        | YGKFLADGGCSGGAYDII  | 73        | DSSVLCECYDAGCAWYEL  |
| 12        | GTRTIASPKGPVIQMYTN  | 43        | GGCSGGAYDIIICDECHS  | 74        | CYDAGCAWYELTPAE     |
| 13        | PKGPVIQMYTNVDQDLVG  | 44        | YDIIICDECHSTDATSIL  | 75        | GCAWYELTPAETTV      |
| 14        | MYTNVDQDLVWPAPQGS   | 45        | ECHSTDATSILGIGTVLD  | 76        | WYELTPAETTVRLRAYMN  |
| 15        | DLVWPAPQGSRSRSLPCT  | 46        | TSILGIGTVLDQAETAGA  | 77        | ETTVRLRAYMNTPLPVC   |
| 16        | PQGSRSRSLPCTCGSSDLY | 47        | TVLDQAETAGARLVVLAT  | 78        | AYMNTPLPVCQDHFLEW   |
| 17        | TPCTCGSSDLYLVTRHAD  | 48        | TAGARLVVLATATPPGSV  | 79        | LPVCQDHFLEWEGVFTGL  |
| 18        | SDLYLVTRHADVIPVRRR  | 49        | VLATATPPGSVTVSHPN   | 80        | LEFWEGVFTGLTHIDAHF  |
| 19        | RHADVIPVRRRGDSRGS   | 50        | PGSVTVSHPNIEVALST   | 81        | FTGLTHIDAHFSLQTKQS  |
| 20        | VRRRGDSRGSLLSPRPIS  | 51        | HPNIEVALSTGEIPFY    | 82        | DAHFLSQTQKQSGENFPYL |
| 21        | RGSLLSPRPISYKGS     | 52        | ALSTGEIPFYGKAIPLE   | 83        | TKQSGENFPYLVAYQATV  |
| 22        | RPISYKGSGLPCPA      | 53        | IPFYGKAIPLEVIKGRH   | 84        | FPYLVAYQATVCARAQAP  |
| 23        | GSSGGPLPCPAGHAVGLF  | 54        | IPLEVIKGRHLIFCHSK   | 85        | QATVCARAQAPPSWDQM   |
| 24        | LCPAGHAVGLFRAAVCTR  | 55        | GGRHLIFCHSKKCCDELA  | 86        | AQAPPSWDQMWKCLIRL   |
| 25        | VGLFRAAVCTRGVAKAVD  | 56        | CHSKKCCDELAALVALG   | 87        | WDQMWKCLIRLKLHGP    |
| 26        | VCTRGVAKAVDFIPVENL  | 57        | DELAALVALGINAVAYY   | 88        | LIRLKLHGPPLLYRL     |
| 27        | KAVDFIPVENLETTMRSP  | 58        | VALGINAVAYYRGLDVS   | 89        | LHGPTPLLYRLGAVQNEV  |
| 28        | VENLETTMRSPVFTDNSS  | 59        | VAYYRGLDVSIVIPTSGDV | 90        | LYRLGAVQNEVTLHPIT   |
| 29        | MRSPVFTDNSSPPAVPQS  | 60        | DVSIVIPTSGDVVVVSTDA | 91        | QNEVTLHPITKYIMTCM   |
| 30        | DNSSPPAVPQSFQVAHLH  | 61        | SGDVVVVSTDALMTGFTG  | 92        | HPITKYIMTCMSADLEVV  |
| 31        | VPQSFQVAHLHAPTGS    | 62        | STDALMTGFTGDFDSVID  | 93        | MTCMSADLEVVTSTWVLV  |
