# Supplementary material for: Analysis of FOXP3+ Regulatory T Cells That Display Apparent Viral Antigen Specificity during Chronic Hepatitis C Virus Infection
Source: PubMed Central journal article supplement (PMC2791198; doi:10.1371/journal.ppat.1000707), 2009-12-24
Supplement: ppat.1000707.s003.pdf [file ppat.1000707.s003.pdf]

**Table S3. HLA typing data**

| <i>Patient ID</i> | <i>HLA type</i>                                                 |
|-------------------|-----------------------------------------------------------------|
| S07-04            | A*0301 B*0702 B*2705 CW*0102 CW*0702 DRB1*0101 DRB1*1501        |
| RW05              | A*0222 A*3002 B*4701 B*5801 CW*0602 CW*0701 DRB1*0301 DRB1*1302 |
| PH09              | A*1101 A*6801 B*1302 B*4403 CW*0602 CW*1601 DRB1*0701 DRB1*1301 |
| SA112             | A*1102 A*2407 B*5401 CW*0102 DRB1*0901 DRB1*1201                |
| RW19              | A*0201 A*2902 B*4402 B*4403 CW*0501 CW*1601 DRB1*0701 DRB1*1301 |
| SA11              | A*0101 A*0301 B*0702 B*0801 CW*0701 CW*0702 DRB1*0301 DRB1*0401 |
| PH22              | A*1101 A*2601 B*4001 B*5501 CW*0303 CW*0304 DRB1*1101 DRB1*1103 |
| PH08 gt2a         | A*0301 B*0702 B*3906 CW*0702 DRB1*0101 DRB1*1302                |
