# Supplementary material for: Analysis of FOXP3+ Regulatory T Cells That Display Apparent Viral Antigen Specificity during Chronic Hepatitis C Virus Infection
Source: PubMed Central journal article supplement (PMC2791198; doi:10.1371/journal.ppat.1000707), 2009-12-24

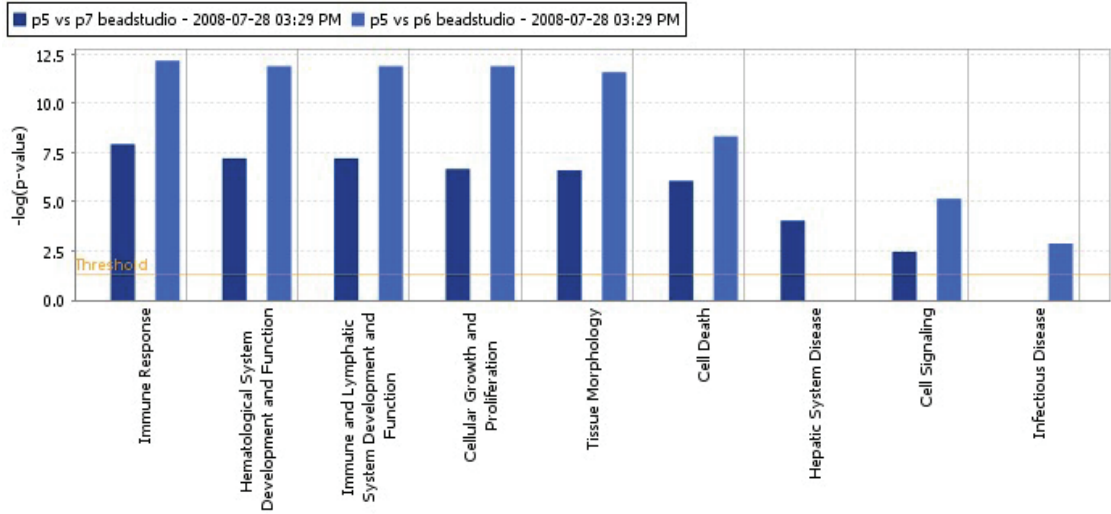

Supplement: ppat.1000707.s007.pdf [file ppat.1000707.s007.pdf]
