# Supplementary material for: Analysis of FOXP3+ Regulatory T Cells That Display Apparent Viral Antigen Specificity during Chronic Hepatitis C Virus Infection
Source: PLoS Pathog. 2009 Dec 24;5(12):e1000707. doi: 10.1371/journal.ppat.1000707 (PMC2791198; doi:10.1371/journal.ppat.1000707)
Supplement: Table S4 — NS3 T cell epitopes found in the literature. (0.08 MB PDF) [file ppat.1000707.s004.pdf]

**Table S4. NS3 T cell epitopes found in the literature****A) T helper epitopes**

| <b>Epitope</b>       | <b>Protein</b> | <b>Position</b> | <b>Genotype</b> | <b>MHC II Association</b>                       | <b>Reference</b> |
|----------------------|----------------|-----------------|-----------------|-------------------------------------------------|------------------|
| TRTIASPKGPVIQMY      | NS3            | 1087-1101       | 1A              | class II                                        | (4)              |
| DLVGWPAPQGSRSLT      | NS3            | 1107-1121       | 1A              | class II                                        | (4)              |
| CPAGHAVGIFRAAVCTRGVA | NS3            | 1171-1190       | 1A              | DRB1*0101,<br>DRB1*0401,<br>DRB1*1501,DRB1*0404 | (23)             |
| QGYKVLVLNPSVAAT      | NS3            | 1247-1261       | 1A              | DRB1*0101,<br>DRB1*0401,<br>DRB1*1001,DRB1*1104 | (23)             |
| GGRHLIFCHSKKKCD      | NS3            | 1387-1401       | 1B              | DR13,DR15                                       | (9)              |
| LIFCHSKKKCDELA       | NS3            | 1391-1405       | 1A              | DRB1*15                                         | (4)              |
| HSKKKCDEL            | NS3            | 1395-1403       | 1A/1B           | DRB1*15                                         | (4)              |
| TQTVDFSLDPTFTIE      | NS3            | 1459-1473       | 1B              | DR13,DR15                                       | (9)              |
| EQYVDFSLDPTFSIE      | NS3            | 1465-1479       | 3A              | class II                                        | (16)             |
| MFDSSVLCECYDAGC      | NS3            | 1511-1525       | 1A/1B           | DR7, DR13                                       | (9)              |
| TTVRLRAYMNTPLPV      | NS3            | 1531-1550       | 1B              | DRB1*0701                                       | (23)             |
| FPYLVAYQATVCARA      | NS3            | 1583-1597       | 1B              | DR13,DR15                                       | (9)              |
| TAYQATVCARAQAPP      | NS3            | 1593-1607       | 3A              | class II                                        | (16)             |
| YLVAYQATVCARAQAP     | NS3            | 1585-1600       | 1B              | DRB1*1001                                       | (23)             |

## B) CTL epitopes

| <b>Epitope</b>       | <b>Protein</b> | <b>Position</b> | <b>Genotype</b> | <b>MHC I Association</b> | <b>Reference</b> |
|----------------------|----------------|-----------------|-----------------|--------------------------|------------------|
| AYSQQTRGL            | NS3            | 1031-1039       | 1B              | A24                      | (3)              |
| VEGEVQIVSTAAQTF      | NS3            | 1055-1069       | 1A              | class I                  | (4)              |
| CINGVWCTV            | NS3            | 1073-1081       | 1A              | A2                       | (5)              |
| QTFLATCINGVCWTV      | NS3            | 1067-1081       | 1A              | class I                  | (4)              |
| ATCINGVCWTVYHGAGTRTI | NS3            | 1071-1090       | 1A              | class I                  | (6)              |
| TRTIASPKGPVIQMY      | NS3            | 1087-1101       | 1A              | class I                  | (4)              |
| AGTRTIASPKGPVIQM     | NS3            | 1085-1100       | 1A              | class I                  | (7)              |
| MYTNVDQDL            | NS3            | 1100-1108       | 1A              | A24                      | (8)              |
| RRRGDSRGSLLSPRP      | NS3            | 1143-1157       | 1B              | class I                  | (9)              |
| LLCPAGHAV            | NS3            | 1169-1177       | 1A              | A2                       | (10)             |
| CPAGHAVGIFRAAVCTRGVA | NS3            | 1171-1190       | 1A              | A2                       | (6)              |
| HAVGLFRAA            | NS3            | 1175-1183       | 1A              | A68                      | (6)              |
| AYAAQGYKVL           | NS3            | 1243-1252       | 1B              | Cw*0303, Cw*0304         | (11)             |
| TLGFGAYMSK           | NS3            | 1261-1270       | 1A              | A11                      | (12)             |
| GAYMSKAHGV           | NS3            | 1265-1274       | 1A/1B           | A11                      | (13)             |
| LGFGAYMSK            | NS3            | 1262-1270       | 1A              | A3                       | (10)             |
| TITGAPVTYSTYK        | NS3            | 1284-1298       | 1B              | A2                       | (14)             |
| TGAPVTYSTY           | NS3            | 1287-1296       | 1B              | A2                       | (14)             |
| TGSPITYSTY           | NS3            | 1287-1296       | 1A              | A2                       | (10)             |
| TYSTYGKFL            | NS3            | 1292-1300       | 1A/1B           | A*2402                   | (15)             |
| CHAQDATTVL           | NS3            | 1318-1327       | 3A              | B38                      | (16)             |
| HPNIEEVAL            | NS3            | 1359-1367       | 1A/1B           | B*3501                   | (7)              |
| GEIPFYGKAI           | NS3            | 1376-1385       | 3A              | B44                      | (17)             |
| GEIPFYGKAI           | NS3            | 1371-1380       | 1A              | C*1402                   | (7)              |
| FYGKAIPIEAI          | NS3            | 1375-1385       | 1B              | A*2402                   | (11)             |
| HSKKKCDEL            | NS3            | 1395-1403       | 1A/1B           | B8                       | (4)              |
| HSKRKCDEL            | NS3            | 1395-1403       | 1A/1B           | class I                  | (7)              |
| HSKKKCDELT           | NS3            | 1395-1404       | 1A              | B8                       | (18)             |
| ELAAKLVAL            | NS3            | 1402-1410       | 1A              | B8                       | (19)             |
| ELAAKLVLGL           | NS3            | 1402-1410       | 1A              | B8                       | (20)             |
| LAACLVALGINAVAY      | NS3            | 1403-1417       | 1A              | A2                       | (6)              |
| ATDALMTCY            | NS3            | 1436-1444       | 1A              | A1                       | (21)             |
| DVVVVATDALMTGYT      | NS3            | 1431-1445       | 1A              | class I                  | (4)              |
| GDVVVVSTDALMTGY      | NS3            | 1430-1444       | 1A              | class I                  | (7)              |
| ALMTGYTGDFDSVI       | NS3            | 1439-1452       | 1A              | class I                  | (7)              |
| STDALMTGFTGDFDS      | NS3            | 1436-1450       | 1A              | class I                  | (22)             |
| GFTGDFDSV            | NS3            | 1443-1451       | 1A/1B           | A*0206                   | (11)             |
| CLIRLKPTLHGPTPLLYR   | NS3            | 1610-1627       | 1A/1B           | class I                  | (6)              |
| LIRLKPTL             | NS3            | 1611-1618       | 1A/1B           | B8                       | (6)              |
| TLTHPVTK             | NS3            | 1636-1643       | 1A              | A11                      | (12)             |
| EVTLTHPITKYIMTCMSA   | NS3            | 1634-1651       | 1A/1B           | B8                       | (18)             |
| TLTHPITK             | NS3            | 1636-1643       | 1A/1B           | A11                      | (18)             |

### Supplementary references

1. Yamada, N., K. Tanihara, M. Mizokami, K. Ohba, A. Takada, M. Tsutsumi, and T. Date. 1994. Full-length sequence of the genome of hepatitis C virus type 3a: comparative study with different genotypes. *J Gen Virol* 75 ( Pt 11):3279-3284.
2. Kolykhalov, A.A., E.V. Agapov, K.J. Blight, K. Mihalik, S.M. Feinstone, and C.M. Rice. 1997. Transmission of hepatitis C by intrahepatic inoculation with transcribed RNA. *Science* 277:570-574.
3. Kurokohchi, K., K. Arima, and M. Nishioka. 2001. A novel cytotoxic T-cell epitope presented by HLA-A24 molecule in hepatitis C virus infection. *J Hepatol* 34:930-935.
4. Wertheimer, A.M., C. Miner, D.M. Lewinsohn, A.W. Sasaki, E. Kaufman, and H.R. Rosen. 2003. Novel CD4+ and CD8+ T-cell determinants within the NS3 protein in subjects with spontaneously resolved HCV infection. *Hepatology* 37:577-589.
5. Cerny, A., P. Fowler, M.A. Brothers, M. Houghton, H.J. Schlicht, and F.V. Chisari. 1995. Induction in vitro of a primary human antiviral cytotoxic T cell response. *Eur J Immunol* 25:627-630.
6. Lauer, G.M., E. Barnes, M. Lucas, J. Timm, K. Ouchi, A.Y. Kim, C.L. Day, G.K. Robbins, D.R. Casson, M. Reiser, G. Dusheiko, T.M. Allen, R.T. Chung, B.D. Walker, and P. Klenerman. 2004. High resolution analysis of cellular immune responses in resolved and persistent hepatitis C virus infection. *Gastroenterology* 127:924-936.
7. Cox, A.L., T. Mosbruger, Q. Mao, Z. Liu, X.H. Wang, H.C. Yang, J. Sidney, A. Sette, D. Pardoll, D.L. Thomas, and S.C. Ray. 2005. Cellular immune selection with hepatitis C virus persistence in humans. *J Exp Med* 201:1741-1752.

8. Ito, A., T. Kanto, N. Kuzushita, T. Tatsumi, Y. Sugimoto, T. Miyagi, T. Takehara, K. Katayama, K. Mochizuki, N. Hiramatsu, A. Kasahara, I. Yoshiya, Y. Sasaki, M. Hori, and N. Hayashi. 2001. Generation of hepatitis C virus-specific cytotoxic T lymphocytes from healthy individuals with peptide-pulsed dendritic cells. *J Gastroenterol Hepatol* 16:309-316.
9. Dutoit, V., D. Ciuffreda, D. Comte, J.J. Gonvers, and G. Pantaleo. 2005. Differences in HCV-specific T cell responses between chronic HCV infection and HIV/HCV co-infection. *Eur J Immunol* 35:3493-3504.
10. Rosen, H.R., G. Marousek, and S. Chou. 2002. A longitudinal analysis of T-cell epitope-coding regions of hepatitis C virus after liver transplantation. *Transplantation* 74:209-216.
11. Hakamada, T., K. Funatsuki, H. Morita, T. Ugajin, I. Nakamura, H. Ishiko, Y. Matsuzaki, N. Tanaka, and M. Imawari. 2004. Identification of novel hepatitis C virus-specific cytotoxic T lymphocyte epitopes by ELISpot assay using peptides with human leukocyte antigen-A\*2402-binding motifs. *J Gen Virol* 85:1521-1531.
12. Wong, D.K., D.D. Dudley, N.H. Afdhal, J. Dienstag, C.M. Rice, L. Wang, M. Houghton, B.D. Walker, and M.J. Koziel. 1998. Liver-derived CTL in hepatitis C virus infection: breadth and specificity of responses in a cohort of persons with chronic infection. *J Immunol* 160:1479-1488.
13. Cucchiarini, M., A.R. Kammer, B. Grabscheid, H.M. Diepolder, T.J. Gerlach, N. Gruner, T. Santantonio, J. Reichen, G.R. Pape, and A. Cerny. 2000. Vigorous peripheral blood cytotoxic T cell response during the acute phase of hepatitis C virus infection. *Cell Immunol* 203:111-123.
14. Kurokohchi, K., T. Akatsuka, C.D. Pendleton, A. Takamizawa, M. Nishioka, M. Battegay, S.M. Feinstone, and J.A. Berzofsky. 1996. Use of recombinant protein to identify a motif-negative human cytotoxic T-cell epitope presented by HLA-A2 in the hepatitis C virus NS3 region. *J Virol* 70:232-240.

15. Nakamoto, Y., S. Kaneko, H. Takizawa, Y. Kikumoto, M. Takano, Y. Himeda, and K. Kobayashi. 2003. Analysis of the CD8-positive T cell response in Japanese patients with chronic hepatitis C using HLA-A\*2402 peptide tetramers. *J Med Virol* 70:51-61.
16. Guglietta, S., A.R. Garbuglia, V. Pacciani, C. Scotta, M.P. Perrone, L. Laurenti, E. Spada, A. Mele, M.R. Capobianchi, G. Taliani, A. Folgori, A. Vitelli, L. Ruggeri, A. Nicosia, E. Piccolella, and P. Del Porto. 2005. Positive selection of cytotoxic T lymphocyte escape variants during acute hepatitis C virus infection. *Eur J Immunol* 35:2627-2637.
17. Sidney, J., S. Southwood, V. Pasquetto, and A. Sette. 2003. Simultaneous prediction of binding capacity for multiple molecules of the HLA B44 supertype. *J Immunol* 171:5964-5974.
18. Timm, J., G.M. Lauer, D.G. Kavanagh, I. Sheridan, A.Y. Kim, M. Lucas, T. Pillay, K. Ouchi, L.L. Reyor, J. Schulze zur Wiesch, R.T. Gandhi, R.T. Chung, N. Bhardwaj, P. Klenerman, B.D. Walker, and T.M. Allen. 2004. CD8 epitope escape and reversion in acute HCV infection. *J Exp Med* 200:1593-1604.
19. Giuggio, V.M., H.L. Bonkovsky, J. Smith, and A.L. Rothman. 1998. Inefficient recognition of autologous viral sequences by intrahepatic hepatitis C virus-specific cytotoxic T lymphocytes in chronically infected subjects. *Virology* 251:132-140.
20. Ward, S., G. Lauer, R. Isba, B. Walker, and P. Klenerman. 2002. Cellular immune responses against hepatitis C virus: the evidence base 2002. *Clin Exp Immunol* 128:195-203.
21. Lauer, G.M., K. Ouchi, R.T. Chung, T.N. Nguyen, C.L. Day, D.R. Purkis, M. Reiser, A.Y. Kim, M. Lucas, P. Klenerman, and B.D. Walker. 2002. Comprehensive analysis of CD8(+)-T-cell responses against hepatitis C virus reveals multiple unpredicted specificities. *J Virol* 76:6104-6113.
22. Kennedy, P.T., S. Urbani, R.A. Moses, B. Amadei, P. Fisicaro, J. Lloyd, M.K. Maini, G. Dusheiko, C. Ferrari, and A. Bertoletti. 2006. The influence of T cell cross-reactivity on HCV-peptide specific human T cell response. *Hepatology* 43:602-611.

23. Schulze zur Wiesch, J., G.M. Lauer, C.L. Day, A.Y. Kim, K. Ouchi, J.E. Duncan, A.G. Wurcel, J. Timm, A.M. Jones, B. Mothe, T.M. Allen, B. McGovern, L. Lewis-Ximenez, J. Sidney, A. Sette, R.T. Chung, and B.D. Walker. 2005. Broad repertoire of the CD4+ Th cell response in spontaneously controlled hepatitis C virus infection includes dominant and highly promiscuous epitopes. *J Immunol* 175:3603-3613.
